# Supplementary material for: Modulatory effect of metformin and its transporters on immune infiltration in tumor microenvironment: a bioinformatic study with experimental validation
Source: Discov Oncol. 2025 May 31;16:973. doi: 10.1007/s12672-025-02766-y (PMC12126455; doi:10.1007/s12672-025-02766-y)
Supplement: Supplementary file 1 — Additional file1 [file 12672_2025_2766_MOESM1_ESM.xlsx]

## Sheet: Sheet1
		Supplementary file 1			Raw Data obtained from TIMER2.0 website for the correlation of OCT1, OCT2, and OCT3 genes expression												Positive Correlation
					with 14 types of immune infiltrates in TCGA data												Negative Correlation
					Gene Module with Purity Adjustment were selected in TIMER2.0 with CIBERSORT Algorithm
					Positive Correlation means gene expression increase correlates with increased Immune infiltrates.												TIMER2.0 website: http://timer.cistrome.org/
					Negative Correlation means gene expression increase correlates with decreased immune infiltrates
					Sig means Significant, and Non-Sig means nonsignificant
			CD8+ Tcell (OCT 1)									CD8+ Tcell (OCT 2)									CD8+ Tcell (OCT 3)
			The Tumor Purity				The Infiltrate					The Tumor Purity				The Infiltrate					The Tumor Purity				The Infiltrate
		Cancer Types	Rho	P-value			Rho	P-value			Cancer Types	Rho	P-value			Rho	P-value			Cancer Types	Rho	P-value			Rho	P-value
				Sig (<0.05)	Non-Sig (>0.05)			Sig (<0.05)	Non-Sig (>0.05)				Sig (<0.05)	Non-Sig (>0.05)			Sig (<0.05)	Non-Sig (>0.05)				Sig (<0.05)	Non-Sig (>0.05)			Sig (<0.05)	Non-Sig (>0.05)
		HNSC-HPV+	-0.094		0.38		-0.246	0.0204			KIRP	-0.094		0.133		-0.178	0.00418			HNSC-HPV+	-0.198		0.062		-0.284	0.00698
		HNSC	-0.123	0.00612			-0.189	2.33e-05			HNSC-HPV-	-0.104	0.038			-0.169	0.000711			KIRP	-0.134	0.0307			-0.269	1.15e-05
		HNSC-HPV-	-0.109	0.0286			-0.162	0.00111			KICH	-0.225		0.0689		0.276	0.0263			ACC	0.19		0.104		-0.244	0.0375
		STAD	-0.048		0.352		-0.107	0.0375			PAAD	-0.025		0.749		0.264	0.000484			COAD	0.107	0.0315			-0.228	0.000141
		UCS	0.093		0.504		0.187		0.18		READ	0.003		0.976		0.14		0.188		HNSC	-0.285	1.13e-10			-0.214	1.74e-06
		READ	0.021		0.809		0.185		0.0808		MESO	-0.084		0.442		0.133		0.226		OV	-0.387	2.42e-10			-0.185	0.00339
		KICH	-0.173		0.165		0.055		0.662		UCEC	0.012		0.84		0.095		0.381		HNSC-HPV-	-0.28	1.18e-08			-0.182	0.000258
		UVM	-0.209		0.0669		0.159		0.167		LUAD	-0.052		0.246		0.092	0.0415			LUAD	0.006		0.89		-0.1777	7.74e-05
		BRCA-Her2	-0.036		0.762		0.132		0.271		UCS	-0.221		0.109		0.063		0.656		STAD	0.024		0.64		-0.144	0.0049
		PAAD	-0.017		0.829		0.125		0.102		ACC	-0.422	0.000179			0.062		0.604		LGG	-0.06		0.188		-0.107	0.0195
		THYM	-0.128		0.171		0.087		0.356		ESCA	-0.235	0.00147			0.06		0.425		LUSC	-0.35	3.35e-15			-0.105	0.0214
		SKCM-Primary	0.038		0.702		0.118		0.238		CESC	-0.171	0.00434			0.058		0.339		UCEC	-0.212	0.000248			0.139		0.196
		DLBC	-0.352	0.0221			0.002		0.99		HNSC-HPV+	-0.201		0.0581		0.054		0.617		ESCA	-0.262	0.000373			0.101		0.177
		GBM	0.012		0.893		0.037		0.667		CHOL	-0.193		0.258		0.035		0.843		BRCA-LumA	-0.502	2.09e-34			0.099	0.0249
		SKCM	0.018		0.709		0.098	0.0357			KIRC	-0.002		0.971		0.02		0.67		READ	0.213	0.0115			0.097		0.364
		SKCM-Metastasis	0.013		0.802		0.094		0.0766		STAD	-0.057		0.269		0.016		0.751		KICH	-0.458	0.000111			0.089		0.483
		BRCA-Basal	-0.087		0.253		0.087		0.252		SARC	0.214	0.000763			0.013		0.843		UCS	-0.034		0.81		0.079		0.573
		KIRP	0.055		0.379		0.009		0.882		THCA	0.029		0.521		0.012		0.793		MESO	0.002		0.988		0.07		0.524
		KIRC	-0.042		0.37		0.065		0.165		LGG	-0.053		0.244		0.01		0.833		THCA	-0.04		0.382		0.056		0.219
		LGG	0.02		0.667		0.056		0.22		SKCM-Metastasis	-0.191	0.000293			0.006		0.915		LIHC	0.055		0.306		0.047		0.384
		BRCA	-0.076	0.01161			0.004		0.907		TGCT	0.436	2.98e-08			0.001		0.987		BRCA	-0.471	3.44e-56			0.043		0.179
		UCEC	0.03		0.606		0.043		0.689		DLBC	-0.357	0.0201			-0.243		0.126		UVM	0.016		0.891		0.041		0.724
		LIHC	-0.041		0.443		0.028		0.608		PCPG	-0.188	0.0147			-0.144		0.0642		PCPG	-0.489	1.77e-11			0.02		0.797
		BRCA-LumB	-0.134		0.0627		-0.097		0.183		THYM	-0.096		0.306		-0.131		0.164		BRCA-LumB	-0.447	7.56e-11			0.016		0.831
		CESC	-0.081		0.178		-0.01		0.869		OV	-0.216	0.000592			-0.115		0.0702		DLBC	-0.532	0.000289			-0.183		0.251
		PRAD	-0.151	0.00203			0.009		0.847		BLCA	-0.335	3.8e-11			-0.1		0.0548		SKCM-Primary	-0.295	0.00251			-0.177		0.0749
		PCPG	-0.047		0.541		0.014		0.86		HNSC	-0.105	0.0199			-0.1	0.026			BRCA-Basal	-0.317	1.96e-05			-0.115		0.129
		THCA	-0.02		0.653		0.001		0.991		BRCA-Her2	-0.304	0.00886			-0.065		0.585		GBM	0.043		0.615		-0.1		0.243
		ACC	-0.017		0.884		-0.197		0.0942		BRCA-LumB	-0.146	0.0424			-0.063		0.387		TGCT	0.19	0.0206			-0.094		0.26
		TGCT	0.043		0.604		-0.125		0.13		SKCM-Primary	0.102		0.307		-0.05		0.614		KIRC	0.006		0.895		-0.088		0.06
		MESO	0.01		0.926		0.208		0.0558		BRCA-Basal	-0.19	0.0119			-0.036		0.634		BLCA	-0.447	1.49e-19			-0.086		0.1
		LUSC	-0.041		0.373		-0.058		0.202		LIHC	0.103		0.0561		-0.026		0.624		SKCM	-0.469	1.81e-26			-0.059		0.208
		OV	-0.049		0.445		-0.09		0.159		GBM	0.018		0.83		-0.02		0.815		CESC	-0.246	3.41e-05			-0.058		0.339
		CHOL	-0.151		0.379		-0.083		0.635		COAD	-0.143	0.00392			-0.015		0.81		BRCA-Her2	-0.487	1.26e-05			-0.047		0.697
		BRCA-LumA	-0.057		0.197		-0.047		0.286		BRCA	-0.198	2.88e-10			-0.014		0.662		CHOL	-0.244		0.151		-0.044		0.801
		COAD	-0.059		0.239		-0.041		0.502		PRAD	-0.369	6.8e-15			-0.01		0.839		SKCM-Metastasis	-0.515	1.79e-25			-0.018		0.736
		LUAD	-0.09	0.0456			-0.039		0.383		LUSC	-0.083		0.0713		-0.009		0.839		PRAD	-0.216	8.92e-06			-0.015		0.753
		SARC	-0.009		0.887		-0.013		0.842		UVM	0.038		0.738		-0.009		0.94		THYM	-0.04		0.674		-0.008		0.93
		BLCA	-0.104	0.0468			-0.013		0.806		SKCM	-0.132	0.00471			-0.008		0.871		PAAD	0.012		0.881		-0.006		0.935
		ESCA	-0.194	0.00878			0.002		0.98		BRCA-LumA	-0.197	6.2e-06			-0.006		0.884		SARC	0.304	1.26e-06			-0.004		0.947
			CD4+ Tcell (OCT 1)									CD4+ Tcell (OCT 2)									CD4+ Tcell (OCT 3)
			The Tumor Purity				The Infiltrate					The Tumor Purity				The Infiltrate					The Tumor Purity				The Infiltrate
		Cancer Types	Rho	P-value			Rho	P-value			Cancer Types	Rho	P-value			Rho	P-value			Cancer Types	Rho	P-value			Rho	P-value
				Sig (<0.05)	Non-Sig (>0.05)			Sig (<0.05)	Non-Sig (>0.05)				Sig (<0.05)	Non-Sig (>0.05)			Sig (<0.05)	Non-Sig (>0.05)				Sig (<0.05)	Non-Sig (>0.05)			Sig (<0.05)	Non-Sig (>0.05)
		UCS	0.093		0.504		-0.284	0.0391			THYM	-0.096		0.306		-0.362	6.88e-05			THYM	-0.04		0.674		-0.316	0.000592
		THYM	-0.128		0.171		0.211	0.0234			OV	-0.216	0.000592			0.135	0.0334			BLCA	-0.447	1.45e-19			-0.181	0.000488
		COAD	-0.059		0.239		0.144	0.0169			HNSC-HPV-	-0.104	0.038			0.114	0.0231			CESC	-0.246	3.41e-05			-0.14	0.0195
		HNSC-HPV-	-0.109	0.0286			0.107	0.0321			BRCA-Her2	-0.304	0.00886			\	\	\		GBM	0.043		0.615		0.201	0.0185
		HNSC	-0.123	0.00612			0.105	0.0194			KIRP	-0.094		0.133		\	\	\		BRCA-Basal	-0.317	1.96e-05			0.179	0.0178
		BRCA-Her2	-0.036		0.762		\	\	\		MESO	-0.084		0.442		\	\	\		SKCM	-0.469	1.81e-26			0.141	0.00247
		KIRP	0.055		0.379		\	\	\		PRAD	-0.369	6.8e-15			\	\	\		SKCM-Metastasis	-0.515	1.79e-25			0.141	0.00809
		MESO	0.01		0.926		\	\	\		UCS	-0.221		0.109		0.175		0.211		LGG	-0.06		0.188		0.118	0.0101
		PRAD	-0.151	0.00203			\	\	\		GBM	0.018		0.83		0.165		0.0541		BRCA-Her2	-0.487	1.26e-05			\	\	\
		READ	0.021		0.809		0.197		0.0626		DLBC	-0.357	0.0201			0.149		0.351		KIRP	-0.134	0.0307			\	\	\
		ACC	-0.017		0.884		0.18		0.127		TGCT	0.436	2.98e-08			0.136		0.0996		MESO	0.002		0.988		\	\	\
		GBM	0.012		0.893		0.144		0.093		PAAD	-0.025		0.749		0.119		0.123		PRAD	-0.216	8.92e-06			\	\	\
		BRCA-LumB	-0.134		0.0627		0.102		0.16		READ	0.003		0.976		0.096		0.366		DLBC	-0.532	0.000289			0.247		0.119
		SKCM-Primary	0.038		0.702		0.088		0.377		LGG	-0.053		0.244		0.087		0.0563		SKCM-Primary	-0.295	0.00251			0.161		0.106
		KIRC	-0.042		0.37		0.066		0.158		KICH	-0.225		0.0689		0.068		0.592		KICH	-0.458	0.000111			0.156		0.216
		THCA	-0.02		0.653		0.065		0.152		STAD	-0.057		0.269		0.062		0.232		PAAD	0.012		0.881		0.146		0.0563
		HNSC-HPV+	-0.094		0.38		0.056		0.602		HNSC	-0.105	0.0199			0.057		0.205		CHOL	-0.244		0.151		0.106		0.545
		PAAD	-0.017		0.829		0.032		0.683		LUAD	-0.052		0.246		0.052		0.247		STAD	0.024		0.64		0.084		0.102
		BRCA-LumA	-0.057		0.197		0.027		0.545		COAD	-0.143	0.00392			0.049		0.42		COAD	0.107	0.0315			0.081		0.182
		ESCA	-0.194	0.00878			0.026		0.732		SKCM-Metastasis	-0.191	0.000293			0.046		0.385		HNSC	-0.285	1.13e-10			0.077		0.0887
		BRCA	-0.076	0.0161			0.023		0.462		LUSC	-0.083		0.0714		0.037		0.422		HNSC-HPV-	-0.28	1.18e-08			0.074		0.14
		KICH	-0.173		0.165		0.023		0.853		SKCM	-0.132	0.00471			0.036		0.439		OV	-0.387	2.42e-10			0.065		0.307
		UCEC	0.03		0.606		0.018		0.868		BRCA-Basal	-0.19	0.0119			0.018		0.818		HNSC-HPV+	-0.198		0.062		0.044		0.684
		CESC	-0.081		0.178		0.006		0.927		BRCA-LumA	-0.197	6.2e-06			0.006		0.892		UCEC	-0.212	0.000248			0.034		0.752
		SARC	-0.009		0.887		-0.089		0.166		SKCM-Primary	0.102		0.307		0.005		0.957		THCA	-0.04		0.382		0.033		0.469
		CHOL	-0.151		0.379		-0.084		0.63		BRCA	-0.198	2.88e-10			0.001		0.969		ACC	0.19		0.104		0.029		0.808
		STAD	-0.048		0.352		-0.066		0.199		HNSC-HPV+	-0.201		0.0581		-0.203		0.0559		PCPG	-0.489	1.77e-11			0.029		0.711
		SKCM-Metastasis	0.013		0.802		-0.063		0.236		SARC	0.214	0.000763			-0.121		0.06		ESCA	-0.262	0.000373			0.027		0.714
		LUAD	-0.09	0.0456			-0.059		0.189		UCEC	0.012		0.84		-0.08		0.459		LUAD	0.006		0.89		0.026		0.561
		BLCA	-0.104	0.0468			-0.046		0.375		CHOL	-0.193		0.258		-0.074		0.673		READ	0.213	0.0115			0.022		0.84
		BRCA-Basal	-0.087		0.253		-0.044		0.568		KIRC	-0.002		0.971		-0.071		0.127		TGCT	0.19	0.0206			0.022		0.787
		SKCM	0.018		0.709		-0.031		0.514		UVM	0.038		0.738		-0.062		0.591		BRCA	-0.471	3.44e-56			0.003		0.914
		LUSC	-0.041		0.373		-0.03		0.517		BRCA-LumB	-0.146	0.0424			-0.055		0.449		UVM	0.016		0.891		-0.14		0.226
		LIHC	-0.041		0.443		-0.029		0.588		ACC	-0.422	0.000179			-0.045		0.709		SARC	0.304	1.26e-06			-0.085		0.188
		TGCT	0.043		0.604		-0.028		0.74		THCA	0.029		0.521		-0.04		0.373		UCS	-0.034		0.81		-0.083		0.554
		UVM	-0.209		0.0669		-0.028		0.807		PCPG	-0.188	0.0147			-0.038		0.622		KIRC	0.006		0.895		-0.073		0.117
		OV	-0.049		0.445		-0.022		0.735		BLCA	-0.335	3.8e-11			-0.03		0.562		BRCA-LumB	-0.0447	7.56e-11			-0.049		0.5
		DLBC	-0.352	0.0221			-0.018		0.909		ESCA	-0.235	0.00147			-0.023		0.761		LUSC	-0.35	3.35e-15			-0.049		0.286
		LGG	0.02		0.667		-0.012		0.801		LIHC	0.103		0.0561		-0.013		0.812		BRCA-LumA	0.502	2.09e-34			-0.037		0.404
		PCPG	-0.047		0.541		-0.012		0.879		CESC	-0.171	0.00434			-0.012		0.842		LIHC	0.055		0.306		-0.01		0.859
			Tregs (OCT 1)									Tregs (OCT 2)									Tregs (OCT 3)
			The Tumor Purity				The Infiltrate					The Tumor Purity				The Infiltrate					The Tumor Purity				The Infiltrate
		Cancer Types	Rho	P-value			Rho	P-value			Cancer Types	Rho	P-value			Rho	P-value			Cancer Types	Rho	P-value			Rho	P-value
				Sig (<0.05)	Non-Sig (>0.05)			Sig (<0.05)	Non-Sig (>0.05)				Sig (<0.05)	Non-Sig (>0.05)			Sig (<0.05)	Non-Sig (>0.05)				Sig (<0.05)	Non-Sig (>0.05)			Sig (<0.05)	Non-Sig (>0.05)
		GBM	0.012		0.893		-0.188	0.0282			KIRC	-0.002		0.971		-0.245	1.06e-07			GBM	0.043		0.615		-0.255	0.0026
		LIHC	-0.041		0.443		-0.162	0.0026			KIRP	-0.094		0.133		-0.228	0.000215			PRAD	-0.216	8.92e-06			-0.239	8.32e-07
		HNSC	-0.123	0.00612			-0.142	0.00153			LGG	-0.053		0.244		-0.194	1.9e-05			PCPG	-0.489	1.77e-11			-0.219	0.00441
		HNSC-HPV-	-0.109	0.0286			-0.14	0.00503			SKCM-Metastasis	-0.191	0.000293			0.131	0.0137			THYM	-0.04		0.674		-0.207	0.0265
		KICH	-0.173		0.165		0.331	0.00715			UCEC	0.012		0.84		0.154		0.153		KIRP	-0.134	0.0307			-0.19	0.00216
		TGCT	0.043		0.604		0.216	0.00861			DLBC	-0.357	0.0201			0.115		0.474		LIHC	0.055		0.306		-0.177	0.000931
		BRCA-Basal	-0.087		0.253		0.16	0.0353			UVM	0.038		0.738		0.105		0.366		LGG	-0.06		0.188		-0.167	0.000252
		COAD	-0.059		0.239		0.141	0.0193			HNSC-HPV+	-0.201		0.0581		0.084		0.436		OV	-0.387	2.42e-10			-0.159	0.0123
		LUAD	-0.09	0.0456			0.125	0.00543			SKCM	-0.132	0.00471			0.07		0.137		HNSC-HPV-	-0.28	1.18e-08			-0.143	0.00412
		LGG	0.02		0.667		0.117	0.0107			LUSC	-0.083		0.0714		0.067		0.146		HNSC	-0.285	1.13e-10			-0.142	0.00164
		UCEC	0.03		0.606		0.153		0.153		COAD	-0.143	0.00392			0.064		0.289		BLCA	-0.447	1.45e-19			-0.13	0.0123
		UVM	-0.209		0.0669		0.122		0.291		CESC	-0.171	0.00434			0.053		0.382		DLBC	-0.532	0.000289			0.317	0.0437
		PAAD	-0.017		0.829		0.121		0.116		BRCA-Her2	-0.304	0.00886			0.042		0.725		TGCT	0.19	0.0206			0.274	0.0008
		THYM	-0.128		0.171		0.119		0.207		BRCA-LumB	-0.146	0.0424			0.041		0.571		SKCM-Metastasis	-0.515	1.79e-25			0.25	1.85e-06
		BRCA-Her2	-0.036		0.762		0.103		0.388		HNSC	-0.105	0.0199			0.039		0.387		ESCA	-0.262	0.000373			0.18	0.0154
		BRCA-LumB	-0.134		0.0627		0.089		0.219		BRCA-Basal	-0.19	0.0119			0.036		0.641		BRCA-Basal	-0.317	1.96e-05			0.17	0.0247
		READ	0.021		0.809		0.085		0.423		LUAD	-0.052		0.246		0.028		0.532		SKCM	-0.469	1.81e-26			0.166	0.000357
		BRCA	-0.076	0.0161			0.081	0.0105			BRCA	-0.198	2.88e-10			0.022		0.489		UVM	0.016		0.891		0.147	0.201
		BLCA	-0.104	0.0468			0.076		0.147		OV	-0.216	0.000594			0.018		0.78		BRCA-Her2	-0.487	1.26e-05			0.099		0.407
		LUSC	-0.041		0.373		0.075		0.102		HNSC-HPV-	-0.104	0.038			0.017		0.731		UCEC	-0.212	0.000248			0.082		0.446
		KIRC	-0.042		0.37		0.066		0.157		MESO	-0.084		0.442		0.016		0.882		COAD	0.107	0.0315			0.065		0.284
		STAD	-0.048		0.352		0.054		0.297		BRCA-LumA	-0.197	6.2e-06			0.011		0.801		LUAD	0.006		0.89		0.023		0.61
		PCPG	-0.047		0.541		0.05		0.52		ESCA	-0.235	0.00147			0.007		0.923		BRCA-LumB	-0.447	7.56e-11			0.008		0.91
		CESC	-0.081		0.178		0.028		0.646		THCA	0.029		0.521		0.004		0.933		CESC	-0.246	3.41e-05			0.006		0.92
		BRCA-LumA	-0.057		0.197		0.026		0.558		UCS	0.221		0.109		-0.192		0.168		MESO	0.002		0.988		0.006		0.958
		KIRP	0.055		0.379		0.017		0.782		THYM	-0.096		0.306		-0.162		0.0835		LUSC	-0.35	3.35e-15			0.004		0.937
		CHOL	-0.151		0.379		-0.189		0.277		READ	0.003		0.976		-0.153		0.15		READ	0.213	0.0115			-0.182		0.0857
		UCS	0.093		0.504		-0.148		0.289		SKCM-Primary	0.102		0.307		-0.15		0.132		UCS	-0.034		0.81		-0.181		0.194
		SKCM-Primary	0.038		0.702		0.131		0.189		PAAD	-0.025		0.749		-0.145		0.0578		CHOL	-0.244		0.151		-0.166		0.34
		ESCA	-0.194	0.00878			-0.114		0.129		CHOL	-0.193		0.258		-0.138		0.429		SKCM-Primary	-0.295	0.00251			-0.11		0.271
		HNSC-HPV+	-0.094		0.38		-0.098		0.361		KICH	-0.225		0.0689		-0.131		0.297		ACC	0.19		0.104		-0.104		0.382
		OV	-0.049		0.445		-0.097		0.127		SARC	0.214	0.000763			-0.124		0.0535		HNSC-HPV+	-0.198		0.062		-0.103		0.337
		PRAD	-0.151	0.00203			-0.08		0.104		PCPG	-0.188	0.0147			-0.11		0.156		BRCA-LumA	-0.502	2.09e-34			-0.071		0.107
		MESO	0.01		0.926		-0.06		0.586		GBM	0.018		0.83		-0.105		0.222		KIRC	0.006		0.895		-0.07		0.131
		SKCM	0.018		0.709		-0.042		0.367		BLCA	-0.335	3.8e-11			-0.086		0.0984		SARC	0.304	1.26e-06			-0.066		0.307
		THCA	-0.02		0.653		-0.035		0.437		STAD	-0.057		0.269		-0.067		0.193		STAD	0.024		0.64		-0.057		0.264
		SARC	-0.009		0.887		-0.034		0.598		PRAD	-0.369	6.8e-15			-0.063		0.196		THCA	-0.04		0.382		-0.042		0.353
		SKCM-Metastasis	0.013		0.802		-0.02		0.711		ACC	-0.422	0.000179			-0.052		0.66		PAAD	0.012		88.1		-0.032		0.68
		DLBC	-0.352	0.0221			-0.01		0.95		TGCT	0.436	2.98e-08			-0.022		0.787		KICH	-0.458	0.000111			-0.011		0.929
		ACC	-0.017		0.884		-0.001		0.991		LIHC	0.103		0.0561		-0.019		0.72		BRCA	-0.471	3.44e-56			-0.007		0.833
			Tcell Gamma Delta (OCT 1)									Tcell Gamma Delta (OCT 2)									Tcell Gamma Delta (OCT 3)
			The Tumor Purity				The Infiltrate					The Tumor Purity				The Infiltrate					The Tumor Purity				The Infiltrate
		Cancer Types	Rho	P-value			Rho	P-value			Cancer Types	Rho	P-value			Rho	P-value			Cancer Types	Rho	P-value			Rho	P-value
				Sig (<0.05)	Non-Sig (>0.05)			Sig (<0.05)	Non-Sig (>0.05)				Sig (<0.05)	Non-Sig (>0.05)			Sig (<0.05)	Non-Sig (>0.05)				Sig (<0.05)	Non-Sig (>0.05)			Sig (<0.05)	Non-Sig (>0.05)
		ACC	-0.017		0.884		-0.323	0.00527			PCPG	-0.188	0.0147			0.161	0.0376			LUSC	-0.35	3.35e-15			-0.165	0.000297
		LUSC	-0.041		0.373		-0.135	0.00306			BRCA-LumB	-0.146	0.0424			0.157	0.0295			OV	-0.387	2.42e-10			-0.149	0.0184
		UCS	0.093		0.504		0.159		0.257		BRCA	-0.198	2.88e-10			0.109	0.000604			LUAD	0.006		0.89		-0.147	0.00106
		MESO	0.01		0.926		0.154		0.161		THCA	0.029		0.521		0.104	0.0219			THCA	-0.04		0.382		0.206	4.6e-06
		SARC	-0.009		0.887		0.115		0.0725		CHOL	-0.193		0.258		0.243		0.16		BRCA-LumA	0.502	2.09e-34			0.15	0.000602
		BRCA-Basal	-0.087		0.253		0.108		0.155		KICH	-0.225		0.0689		0.185		0.139		BRCA	-0.471	3.44e-56			0.117	0.000213
		LIHC	-0.041		0.443		0.104		0.0525		THYM	-0.096		0.306		0.16		0.0869		LIHC	0.055		0.306		0.112	0.0376
		HNSC-HPV-	-0.109	0.0286			0.08		0.111		BRCA-Basal	-0.19	0.0119			0.128		0.0933		READ	0.213	0.0115			0		0.999
		SKCM-Primary	0.038		0.702		0.08		0.422		SARC	0.214	0.000763			0.124		0.0522		THYM	-0.04		0.674		0.156		0.0967
		KIRP	0.055		0.379		0.067		0.281		UCEC	0.012		0.84		0.095		0.381		KICH	-0.458	0.000111			0.143		0.256
		TGCT	0.043		0.604		0.061		0.462		HNSC-HPV-	-0.104	0.038			0.093		0.0639		PCPG	-0.489	1.77e-11			0.113		0.147
		READ	0.021		0.809		0.048		0.655		UVM	0.038		0.738		0.092		0.424		GBM	0.043		0.615		0.107		0.212
		HNSC	-0.123	0.00612			0.046		0.309		MESO	-0.084		0.442		0.091		0.406		BRCA-Basal	-0.317	1.96e-05			0.106		0.166
		DLBC	-0.352	0.0221			0.041		0.801		HNSC	-0.105	0.0199			0.085		0.0593		CHOL	-0.244		0.151		0.103		0.558
		COAD	-0.059		0.239		0.034		0.579		BRCA-LumA	-0.197	6.2e-06			0.083		0.0584		BRCA-Her2	-0.487	1.26e-05			0.076		0.525
		SKCM	0.018		0.709		0.033		0.484		UCS	-0.221		0.109		0.077		0.584		SARC	0.304	1.26e-06			0.057		0.375
		ESCA	-0.194	0.00878			0.032		0.67		KIRC	-0.002		0.971		0.07		0.135		BRCA-LumB	-0.447	7.56e-11			0.05		0.494
		CHOL	-0.151		0.379		0.028		0.873		PAAD	-0.025		0.749		0.064		0.409		UCS	-0.034		0.81		0.041		0.768
		SKCM-Metastasis	0.013		0.802		0.028		0.603		STAD	-0.057		0.269		0.051		0.32		STAD	0.024		0.64		0.032		0.534
		GBM	0.012		0.893		0.022		0.797		KIRP	-0.094		0.133		0.047		0.455		ESCA	-0.262	0.000373			0.011		0.882
		BRCA-Her2	-0.036		0.762		0.017		0.885		LGG	-0.053		0.244		0.044		0.333		UCEC	-0.212	0.000248			0.01		0.926
		BRCA-LumA	-0.057		0.197		0.01		0.814		CESC	-0.171	0.00434			0.04		0.506		DLBC	-0.532	0.000289			-0.133		0.407
		KICH	-0.173		0.165		-0.118		0.35		GBM	0.018		0.83		0.037		0.67		PAAD	0.012		0.881		-0.132		0.0846
		THYM	-0.128		0.171		-0.096		0.307		SKCM-Metastasis	-0.191	0.000293			0.033		0.534		HNSC-HPV+	-0.198		0.062		-0.113		0.294
		HNSC-HPV+	-0.094		0.38		-0.074		0.491		PRAD	-0.369	6.8e-15			0.032		0.516		TGCT	0.19	0.0206			-0.102		0.217
		PCPG	-0.047		0.541		-0.07		0.367		BLCA	-0.335	3.8e-11			0.024		0.64		COAD	0.107	0.0315			-0.101		0.0954
		PAAD	-0.017		0.829		-0.066		0.389		HNSC-HPV+	-0.201		0.0581		0.02		0.851		HNSC	-0.285	1.13e-10			-0.079		0.0786
		OV	-0.049		0.445		-0.065		0.308		SKCM	-0.132	0.00471			0.018		0.694		KIRP	-0.134	0.0307			-0.075		0.231
		BLCA	-0.104	0.0468			-0.062		0.235		LUAD	-0.052		0.246		0.016		0.726		HNSC-HPV-	-0.28	1.18e-08			-0.07		0.16
		UCEC	0.03		0.606		-0.05		0.645		BRCA-Her2	-0.304	0.00886			0.015		0.899		KIRC	0.006		0.895		-0.064		0.168
		THCA	-0.02		0.653		-0.046		0.312		READ	0.003		0.976		-0.202		0.0565		MESO	0.002		0.988		-0.061		0.581
		CESC	-0.081		0.178		-0.044		0.462		DLBC	-0.357	0.0201			-0.175		0.273		SKCM-Metastasis	-0.515	1.79e-25			-0.055		0.3
		BRCA-LumB	-0.134		0.0627		-0.043		0.549		SKCM-Primary	0.102		0.307		-0.108		0.278		LGG	-0.06		0.188		-0.036		0.428
		UVM	-0.209		0.0669		-0.038		0.743		COAD	-0.143	0.00392			-0.037		0.542		SKCM	-0.469	1.81e-26			-0.029		0.541
		PRAD	-0.151	0.00203			-0.033		0.504		OV	-0.216	0.000592			-0.035		0.58		ACC	0.19		0.104		-0.028		0.814
		KIRC	-0.042		0.37		-0.031		0.503		LUSC	-0.083		0.0714		-0.028		0.545		UVM	0.016		0.891		-0.028		0.812
		BRCA	-0.076	0.0161			-0.015		0.645		ACC	-0.422	0.000179			-0.017		0.884		CESC	-0.246	3.41e-05			-0.021		0.728
		LGG	0.02		0.667		-0.013		0.779		TGCT	0.436	2.98e-08			-0.016		0.847		BLCA	-0.447	1.45e-19			-0.019		0.714
		LUAD	-0.09	0.0456			-0.01		0.833		LIHC	0.103		0.0561		-0.006		0.91		PRAD	-0.216	8.92e-06			-0.018		0.71
		STAD	-0.048		0.352		-0.005		0.929		ESCA	-0.235	0.00147			-0.002		0.975		SKCM-Primary	-0.295	0.00251			-0.018		0.86
			Tcell Follicular Helper (OCT 1)									Tcell Follicular Helper (OCT 2)									Tcell Follicular Helper (OCT 3)
			The Tumor Purity				The Infiltrate					The Tumor Purity				The Infiltrate					The Tumor Purity				The Infiltrate
		Cancer Types	Rho	P-value			Rho	P-value			Cancer Types	Rho	P-value			Rho	P-value			Cancer Types	Rho	P-value			Rho	P-value
				Sig (<0.05)	Non-Sig (>0.05)			Sig (<0.05)	Non-Sig (>0.05)				Sig (<0.05)	Non-Sig (>0.05)			Sig (<0.05)	Non-Sig (>0.05)				Sig (<0.05)	Non-Sig (>0.05)			Sig (<0.05)	Non-Sig (>0.05)
		CHOL	-0.151		0.379		-0.402	0.0167			READ	0.003		0.976		-0.195	0.000392			TGCT	0.19	0.0206			-0.421	1.09e-07
		TGCT	0.043		0.604		-0.382	1.77e-06			BRCA-Basal	-0.19	0.0119			-0.195	0.01			CHOL	-0.244		0.151		-0.398	0.0179
		MESO	0.01		0.926		0.254	0.019			STAD	-0.057		0.269		-0.164	0.00135			THYM	-0.04		0.674		-0.251	0.00678
		BRCA-Her2	-0.036		0.762		0.234	0.0483			KIRP	-0.094		0.133		-0.156	0.0119			STAD	0.024		0.64		-0.249	9.12e-07
		KIRC	-0.042		0.37		0.225	1.04e-06			COAD	-0.143	0.00392			-0.145	0.016			KIRP	-0.134	0.0307			-0.197	0.0015
		PCPG	-0.047		0.541		0.156	0.0443			KIRC	-0.002		0.971		-0.14	0.00259			BRCA-Basal	-0.317	1.96e-05			-0.179	0.0179
		BRCA	-0.076	0.0161			0.112	0.000383			PRAD	-0.369	6.8e-15			-0.122	0.0128			CESC	-0.246	3.41e-05			-0.178	0.00302
		LGG	0.02		0.667		0		0.996		BLCA	-0.335	3.8e-11			-0.105	0.0434			HNSC	-0.285	1.13e-10			-0.176	8.8e-05
		UCS	0.093		0.504		0.18		0.196		BRCA-Her2	-0.304	0.00886			0.319	0.00634			HNSC-HPV-	-0.28	1.18e-08			-0.155	0.00192
		PAAD	-0.017		0.829		0.127		0.0983		LGG	-0.053		0.244		0.11	0.016			KIRC	0.006		0.895		-0.137	0.00311
		OV	-0.049		0.445		0.123		0.0533		DLBC	-0.357	0.0201			0.26		0.101		PCPG	-0.489	1.77e-11			0.223	0.00379
		SARC	-0.009		0.887		0.11		0.0854		MESO	-0.084		0.442		0.148		0.175		THCA	-0.04		0.382		0.135	0.00284
		ESCA	-0.194	0.00878			0.105		0.161		BRCA-LumB	-0.146	0.0424			0.121		0.0942		UVM	0.016		0.891		0.176		0.127
		LUSC	-0.041		0.373		0.1	0.0296			SARC	0.214	0.000763			0.095		0.137		BRCA-Her2	-0.487	1.26e-05			0.149		0.21
		THCA	-0.02		0.653		0.093	0.0395			THCA	0.029		0.521		0.073		0.109		MESO	0.002		0.988		0.145		0.185
		BRCA-LumA	-0.057		0.197		0.079		0.0719		SKCM-Primary	0.102		0.307		0.065		0.515		GBM	0.043		0.615		0.144		0.0932
		GBM	0.012		0.893		0.078		0.364		ACC	-0.422	0.000179			0.049		0.68		ACC	0.19		0.104		0.096		0.42
		KIRP	0.055		0.379		0.078		0.211		SKCM	-0.132	0.00471			0.048		0.305		DLBC	-0.532	0.000289			0.056		0.728
		BRCA-Basal	-0.087		0.253		0.069		0.369		SKCM-Metastasis	-0.191	0.000293			0.044		0.412		UCS	-0.034		0.81		0.053		0.708
		LUAD	-0.09	0.0456			0.069		0.125		HNSC-HPV+	-0.201		0.0581		0.04		0.71		LGG	-0.06		0.188		0.04		0.38
		THYM	-0.128		0.171		0.065		0.489		ESCA	-0.235	0.00147			0.032		0.674		BRCA-LumB	-0.447	7.56e-11			0.019		0.793
		SKCM-Metastasis	0.013		0.802		0.056		0.296		PCPG	-0.188	0.0147			0.031		0.689		SARC	0.304	1.26e-06			0.013		0.84
		BLCA	-0.104	0.0468			0.055		0.294		UCS	-0.221		0.109		0.02		0.887		OV	-0.387	2.42e-10			0.006		0.93
		BRCA-LumB	-0.134		0.0627		0.052		0.474		LIHC	0.103		0.0561		0.019		0.721		HNSC-HPV+	-0.198		0.062		-0.191		0.0729
		STAD	-0.048		0.352		0.049		0.343		OV	-0.216	0.000592			0.017		0.784		KICH	-0.458	0.000111			-0.189		0.131
		PRAD	-0.151	0.00203			0.044		0.37		BRCA	-0.198	2.88e-10			0.009		0.775		PAAD	0.012		0.881		-0.123		0.109
		CESC	-0.081		0.178		0.043		0.48		KICH	-0.225		0.0689		-0.244		0.0503		UCEC	-0.212	0.000248			-0.109		0.311
		COAD	-0.059		0.239		0.036		0.551		THYM	-0.096		0.306		-0.165		0.0773		READ	0.213	0.0115			-0.107		0.317
		READ	0.021		0.809		0.034		0.75		GBM	0.018		0.83		-0.104		0.226		SKCM-Primary	-0.295	0.00251			-0.102		0.306
		SKCM	0.018		0.709		0.027		0.567		UCEC	0.012		0.84		-0.103		0.338		ESCA	-0.262	0.000373			-0.08		0.286
		DLBC	-0.352	0.0221			0.02		0.901		UVM	0.038		0.738		-0.094		0.418		SKCM	-0.469	1.81e-26			-0.068		0.149
		UCEC	0.03		0.606		-0.191		0.0746		LUSC	-0.083		0.0714		-0.08		0.0828		COAD	0.107	0.0315			-0.066		0.273
		KICH	-0.173		0.165		-0.18		0.151		HNSC-HPV-	-0.104	0.038			-0.067		0.179		LUAD	0.006		0.89		-0.059		0.191
		HNSC-HPV+	-0.094		0.38		-0.172		0.107		CHOL	-0.193		0.258		-0.062		0.722		LIHC	0.055		0.306		-0.053		0.329
		ACC	-0.017		0.884		-0.143		0.227		TGCT	0.436	2.98e-08			-0.045		0.592		BRCA-LumA	-0.502	2.09e-34			-0.045		0.302
		LIHC	-0.041		0.443		-0.101		0.0597		HNSC	-0.105	0.0199			-0.03		0.501		BRCA	-0.471	3.44e-56			-0.043		0.176
		SKCM-Primary	0.038		0.702		-0.088		0.38		CESC	-0.171	0.00434			-0.024		0.691		BLCA	-0.447	1.45e-19			-0.041		0.439
		HNSC	-0.123	0.00612			-0.074		0.102		PAAD	-0.025		0.749		-0.024		0.752		LUSC	-0.35	3.35e-15			-0.037		0.418
		HNSC-HPV-	-0.109	0.0286			-0.046		0.363		LUAD	-0.052		0.246		-0.009		0.834		PRAD	-0.216	8.92e-06			-0.036		0.469
		UVM	-0.209		0.0669		-0.005		0.963		BRCA-LumA	-0.197	6.2e-06			-0.008		0.863		SKCM-Metastasis	-0.515	1.79e-25			-0.032		0.553
			Bcell (OCT 1)									Bcell (OCT 2)									Bcell (OCT 3)
			The Tumor Purity				The Infiltrate					The Tumor Purity				The Infiltrate					The Tumor Purity				The Infiltrate
		Cancer Types	Rho	P-value			Rho	P-value			Cancer Types	Rho	P-value			Rho	P-value			Cancer Types	Rho	P-value			Rho	P-value
				Sig (<0.05)	Non-Sig (>0.05)			Sig (<0.05)	Non-Sig (>0.05)				Sig (<0.05)	Non-Sig (>0.05)			Sig (<0.05)	Non-Sig (>0.05)				Sig (<0.05)	Non-Sig (>0.05)			Sig (<0.05)	Non-Sig (>0.05)
		UCS	0.093		0.504		-0.364	0.00745			READ	0.003		0.976		-0.216	0.0412			TGCT	0.19	0.0206			-0.468	2.2e-09
		PRAD	-0.151	0.00203			-0.171	0.000459			KIRC	-0.002		0.971		-0.132	0.00442			KIRP	-0.134	0.0307			-0.172	0.00558
		ESCA	-0.194	0.00878			-0.148	0.0473			LGG	-0.053		0.244		-0.111	0.0148			SKCM-Metastasis	-0.515	1.79e-25			0.405	2.08e-15
		LIHC	-0.041		0.445		-0.134	0.0128			PRAD	-0.369	6.8e-15			-0.105	0.032			SKCM	-0.469	1.81e-26			0.319	2.69e-12
		TGCT	0.043		0.604		0.241	0.00333			HNSC-HPV+	-0.201		0.0581		0.242	0.0224			THYM	-0.04		0.674		0.314	0.000625
		COAD	-0.059		0.239		0.136	0.024			SKCM-Metastasis	-0.191	0.000293			0.148	0.00532			BRCA-Basal	-0.317	1.96e-05			0.282	0.000161
		THYM	-0.128		0.171		0.131		0.162		HNSC	-0.105	0.0199			0.142	0.00163			ACC	0.19		0.104		0.236	0.0445
		THCA	-0.02		0.653		0.086		0.0563		SKCM	-0.132	0.00471			0.125	0.00736			BRCA-LumA	0.502	2.09e-34			0.226	2.18e-07
		LUSC	-0.041		0.373		0.081		0.0773		HNSC-HPV-	-0.104	0.038			0.108	0.0302			GBM	0.043		0.615		0.197	0.0209
		LGG	0.02		0.667		0.076		0.0961		KIRP	-0.094		0.133		0		0.994		OV	-0.387	2.42e-10			0.193	0.00219
		SARC	-0.009		0.887		0.055		0.389		DLBC	-0.357	0.0201			0.235		0.139		BRCA	-0.471	3.44e-56			0.188	2.42e-09
		SKCM-Primary	0.038		0.72		0.054		0.587		KICH	-0.225		0.0689		0.172		0.171		PCPG	-0.489	1.77e-11			0.169	0.0287
		BRCA-Basal	-0.087		0.253		0.037		0.629		TGCT	0.436	2.98e-08			0.109		0.189		LIHC	0.055		0.306		0.145	0.00709
		BRCA	-0.076	0.0161			0.036		0.262		COAD	-0.143	0.00392			0.078		0.194		PRAD	-0.216	8.92e-06			0.139	0.00453
		OV	-0.049		0.445		0.036		0.574		THYM	-0.096		0.306		0.066		0.486		CHOL	-0.244		0.151		0.287		0.094
		BRCA-LumB	-0.134		0.0627		0.032		0.659		LUSC	-0.083		0.0714		0.065		0.157		UCS	-0.034		0.81		0.241		0.0819
		KICH	-0.173		0.165		0.028		0.826		THCA	0.029		0.521		0.062		0.171		MESO	0.002		0.988		0.2		0.0667
		KIRP	0.055		0.379		0.005		0.933		STAD	-0.057		0.269		0.058		0.262		ESCA	-0.262	0.000373			0.144		0.0545
		CHOL	-0.151		0.379		-0.256		0.138		UCS	-0.221		0.109		0.057		0.685		DLBC	-0.532	0.000289			0.122		0.449
		DLBC	-0.352	0.0221			-0.246		0.121		SKCM-Primary	0.102		0.307		0.046		0.649		STAD	0.024		0.64		0.097		0.0585
		MESO	0.01		0.926		-0.179		0.102		BRCA-Basal	-0.19	0.0119			0.018		0.81		KIRC	0.006		0.895		0.095	0.0424
		GBM	0.012		0.893		-0.123		0.153		BRCA	-0.198	2.88e-10			0.012		0.717		COAD	0.107	0.0315			0.088		0.145
		ACC	-0.017		0.884		-0.112		0.346		CESC	-0.171	0.00434			0.007		0.902		SARC	0.304	1.26e-06			0.074		0.251
		HNSC	-0.123	0.00612			-0.096	0.0333			UCEC	0.012		0.84		-0.169		0.116		THCA	-0.04		0.382		0.072		0.11
		HNSC-HPV-	-0.109	0.0286			-0.09		0.0728		CHOL	-0.193		0.258		-0.129		0.459		BRCA-LumB	-0.447	7.56e-11			0.067		0.354
		READ	0.021		0.809		-0.081		0.449		GBM	0.018		0.83		-0.102		0.236		HNSC-HPV-	-0.28	1.18e-08			0.046		0.357
		SKCM-Metastasis	0.013		0.802		-0.08		0.133		OV	-0.216	0.000592			-0.099		0.121		BLCA	-0.447	1.45e-19			0.044		0.403
		HNSC-HPV+	-0.094		0.38		-0.066		0.538		PAAD	-0.025		0.749		-0.099		0.195		LUSC	-0.35	3.35e-15			0.038		0.41
		UVM	-0.209		0.0669		-0.06		0.604		UVM	0.038		0.738		-0.09		0.435		PAAD	0.012		0.881		0.034		0.662
		SKCM	0.018		0.709		-0.054		0.247		BRCA-Her2	-0.304	0.00886			-0.087		0.467		LGG	-0.06		0.188		0.033		0.473
		BLCA	-0.104	0.0468			-0.037		0.477		ESCA	-0.235	0.00147			-0.082		0.271		UCEC	-0.212	0.000248			0.026		0.81
		PAAD	-0.017		0.829		-0.032		0.679		LUAD	-0.052		0.246		-0.082		0.0681		BRCA-Her2	-0.487	1.26e-05			0.015		0.9
		PCPG	-0.047		0.541		-0.032		0.683		SARC	0.214	0.000763			-0.074		0.251		HNSC	-0.285	1.13e-10			0.004		0.937
		BRCA-Her2	-0.036		0.762		-0.028		0.814		PCPG	-0.188	0.0147			-0.073		0.349		KICH	-0.458	0.000111			-0.218		0.0809
		KIRC	-0.042		0.37		-0.027		0.563		LIHC	0.103		0.0561		-0.055		0.311		UVM	0.016		0.891		-0.19		0.098
		BRCA-LumA	-0.057		0.197		-0.023		0.61		ACC	-0.422	0.000179			-0.039		0.746		CESC	-0.246	3.41e-05			-0.05		0.412
		LUAD	-0.09	0.0456			-0.018		0.687		MESO	-0.084		0.442		-0.036		0.746		HNSC-HPV+	-0.198		0.062		-0.046		0.67
		CESC	-0.081		0.178		-0.011		0.85		BRCA-LumB	-0.146	0.0424			-0.013		0.859		SKCM-Primary	-0.295	0.00251			-0.035		0.728
		STAD	-0.048		0.352		-0.008		0.879		BLCA	-0.335	3.8e-11			-0.01		0.852		LUAD	0.006		0.89		-0.034		0.447
		UCEC	0.03		0.606		-0.004		0.972		BRCA-LumA	-0.197	6.2e-06			-0.005		0.902		READ	0.213	0.0115			-0.03		0.777
			Neutrophil (OCT 1)									Neutrophil (OCT 2)									Neutrophil (OCT 3)
			The Tumor Purity				The Infiltrate					The Tumor Purity				The Infiltrate					The Tumor Purity				The Infiltrate
		Cancer Types	Rho	P-value			Rho	P-value			Cancer Types	Rho	P-value			Rho	P-value			Cancer Types	Rho	P-value			Rho	P-value
				Sig (<0.05)	Non-Sig (>0.05)			Sig (<0.05)	Non-Sig (>0.05)				Sig (<0.05)	Non-Sig (>0.05)			Sig (<0.05)	Non-Sig (>0.05)				Sig (<0.05)	Non-Sig (>0.05)			Sig (<0.05)	Non-Sig (>0.05)
		PCPG	-0.047		0.541		-0.196	0.0113			MESO	-0.084		0.442		0.288	0.0075			PAAD	0.012		0.881		-0.233	0.00219
		KIRP	0.055		0.379		-0.127	0.0413			CHOL	-0.193		0.258		0.232		0.181		HNSC-HPV+	-0.198		0.062		0.311	0.00303
		SKCM-Metastasis	0.013		0.802		-0.108	0.0415			ACC	-0.422	0.000179			0.187		0.113		MESO	0.002		0.988		0.302	0.00494
		LUAD	-0.09	0.0456			-0.107	0.0175			TGCT	0.436	2.98e-08			0.075		0.365		LUSC	-0.35	3.35e-15			0.11	0.0159
		LIHC	-0.041		0.443		0.109	0.0438			KIRC	-0.002		0.971		0.074		0.112		TGCT	0.19	0.0206			0.113		0.173
		HNSC-HPV-	-0.109	0.0286			0		0.993		READ	0.003		0.976		0.065		0.543		SKCM-Primary	-0.295	0.00251			0.099		0.324
		ACC	-0.017		0.884		0.219		0.0627		SARC	0.214	0.000763			0.062		0.332		CESC	-0.246	3.41e-05			0.094		0.117
		READ	0.021		0.809		0.185		0.0804		BLCA	-0.335	3.8e-11			0.052		0.318		PRAD	-0.216	8.92e-06			0.083		0.0917
		KICH	-0.173		0.165		0.177		0.159		KIRP	-0.094		0.133		0.052		0.409		CHOL	-0.244		0.151		0.082		0.641
		HNSC-HPV+	-0.094		0.38		0.138		0.196		UCEC	0.012		0.84		0.052		0.63		KIRP	-0.134	0.0307			0.072		0.246
		DLBC	-0.352	0.0221			0.103		0.523		LIHC	0.103		0.0561		0.045		0.401		HNSC	-0.285	1.13e-10			0.069		0.125
		UVM	-0.209		0.0669		0.09		0.437		LGG	-0.053		0.244		0.023		0.621		OV	-0.387	2.42e-10			0.061		0.34
		ESCA	-0.194	0.00878			0.081		0.282		SKCM-Primary	0.102		0.307		0.02		0.845		READ	0.213	0.0115			0.061		0.568
		BLCA	-0.104	0.0468			0.058		0.267		SKCM-Metastasis	-0.191	0.000293			0.012		0.823		KIRC	0.006		0.895		0.06		0.199
		PRAD	-0.151	0.00203			0.057		0.25		SKCM	-0.132	0.00471			0.009		0.85		SARC	0.304	1.26e-06			0.057		0.379
		LGG	0.02		0.667		0.037		0.42		THCA	0.029		0.521		0.008		0.853		THYM	-0.04		0.674		0.038		0.686
		HNSC	-0.123	0.00612			0.035		0.441		PAAD	-0.025		0.749		0.004		0.962		BRCA-LumB	-0.447	7.56e-11			0.036		0.616
		MESO	0.01		0.926		0.034		0.755		BRCA-Her2	-0.304	0.00886			-0.168		0.159		LUAD	0.006		0.89		0.035		0.433
		BRCA-Her2	-0.036		0.762		0.032		0.788		UVM	0.038		0.738		-0.102		0.376		KICH	-0.458	0.000111			0.031		0.809
		CHOL	-0.151		0.379		0.008		0.966		CESC	-0.171	0.00434			-0.092		0.127		SKCM-Metastasis	-0.515	1.79e-25			0.021		0.698
		BRCA-LumB	-0.134		0.0627		0.004		0.959		THYM	-0.096		0.306		-0.081		0.39		BLCA	-0.447	1.45e-19			0.02		0.696
		SKCM-Primary	0.038		0.702		-0.1		0.319		COAD	-0.143	0.00392			-0.079		0.19		SKCM	-0.469	1.81e-26			0.02		0.674
		THCA	-0.02		0.653		-0.099	0.029			PCPG	-0.188	0.0147			-0.073		0.351		THCA	-0.04		0.382		0.019		0.675
		SKCM	0.018		0.709		-0.091		0.052		ESCA	-0.235	0.00147			-0.072		0.335		STAD	0.024		0.64		0.012		0.812
		PAAD	-0.017		0.829		-0.082		0.286		GBM	0.018		0.83		-0.067		0.437		DLBC	-0.532	0.000289			-0.287		0.0685
		LUSC	-0.041		0.373		-0.07		0.129		OV	-0.216	0.000592			-0.066		0.303		UVM	0.016		0.891		-0.126		0.274
		THYM	-0.128		0.171		-0.056		0.55		UCS	-0.221		0.109		-0.064		0.649		BRCA-Her2	-0.487	1.26e-05			-0.101		0.397
		OV	-0.049		0.445		-0.051		0.422		DLBC	-0.357	0.0201			-0.058		0.719		BRCA-Basal	-0.317	1.96e-05			-0.098		0.199
		BRCA-LumA	-0.057		0.197		-0.047		0.283		HNSC-HPV+	-0.201		0.0581		-0.057		0.598		COAD	0.107	0.0315			-0.096		0.113
		TGCT	0.043		0.604		-0.04		0.628		BRCA-LumB	-0.146	0.0424			-0.034		0.643		LIHC	0.055		0.306		-0.088		0.101
		UCS	0.093		0.504		-0.04		0.779		HNSC	-0.105	0.0199			-0.031		0.491		UCS	0.034		0.81		-0.088		0.529
		GBM	0.012		0.893		-0.039		0.653		PRAD	-0.369	6.8e-15			-0.03		0.543		GBM	0.043		0.615		-0.082		0.342
		STAD	-0.048		0.352		-0.039		0.451		BRCA	-0.198	2.88e-10			-0.024		0.456		BRCA-LumA	0.502	2.09e-34			-0.072		0.104
		KIRC	-0.042		0.37		-0.037		0.43		LUAD	-0.052		0.246		-0.018		0.694		BRCA	-0.471	3.44e-56			-0.063	0.0469
		UCEC	0.03		0.606		-0.028		0.797		HNSC-HPV-	-0.104	0.038			-0.017		0.728		PCPG	-0.489	1.77e-11			-0.06		0.441
		BRCA	-0.076	0.0161			-0.022		0.492		BRCA-Basal	-0.19	0.0119			-0.015		0.84		UCEC	-0.212	0.000248			-0.052		0.63
		COAD	-0.059		0.239		-0.015		0.801		STAD	-0.057		0.269		-0.01		0.852		ESCA	-0.262	0.000373			-0.051		0.493
		CESC	-0.081		0.178		-0.013		0.824		KICH	-0.225		0.0689		-0.009		0.945		ACC	0.19		0.104		-0.016		0.896
		SARC	-0.009		0.887		-0.013		0.838		BRCA-LumA	-0.197	6.2e-06			-0.003		0.939		HNSC-HPV-	-0.28	1.18e-08			-0.01		0.849
		BRCA-Basal	-0.087		0.253		-0.003		0.967		LUSC	-0.083		0.0714		-0.002		0.966		LGG	-0.06		0.188		-0.003		0.94
			Macrophage M0 (OCT 1)									Macrophage M0 (OCT 2)									Macrophage M0 (OCT 3)
			The Tumor Purity				The Infiltrate					The Tumor Purity				The Infiltrate					The Tumor Purity				The Infiltrate
		Cancer Types	Rho	P-value			Rho	P-value			Cancer Types	Rho	P-value			Rho	P-value			Cancer Types	Rho	P-value			Rho	P-value
				Sig (<0.05)	Non-Sig (>0.05)			Sig (<0.05)	Non-Sig (>0.05)				Sig (<0.05)	Non-Sig (>0.05)			Sig (<0.05)	Non-Sig (>0.05)				Sig (<0.05)	Non-Sig (>0.05)			Sig (<0.05)	Non-Sig (>0.05)
		UVM	-0.209		0.0669		-0.257	0.024			KICH	-0.225		0.0689		-0.265	0.033			LUAD	0.006		0.889		-0.268	1.53e-09
		LIHC	-0.041		0.443		-0.228	1.93e-05			KIRC	-0.002		0.971		-0.224	1.24e-06			UCEC	-0.212	0.000248			-0.262	0.0135
		LUSC	-0.041		0.373		0.216	1.89e-06			PAAD	-0.025		0.749		-0.195	0.0108			LIHC	0.055		0.306		-0.251	2.35e-06
		SARC	-0.009		0.887		0.207	0.00115			LIHC	0.103		0.0561		-0.121	0.0242			SARC	0.304	1.26e-06			-0.22	0.000545
		TGCT	0.043		0.604		0.195	0.018			READ	0.003		0.976		0.383	0.00111			MESO	0.02		0.988		0.228	0.0356
		HNSC-HPV-	-0.109	0.0286			0.191	0.000123			ACC	-0.422	0.000179			0.233	0.0472			HNSC-HPV+	-0.198		0.062		0.224	0.0351
		HNSC	-0.123	0.00612			0.18	5.96e-05			THYM	-0.096		0.306		0.212	0.0227			THYM	-0.04		0.674		0.2	0.0317
		LUAD	-0.09	0.0456			0.157	0.000487			HNSC-HPV-	-0.104	0.038			0.145	0.00374			COAD	0.107	0.0315			0.183	0.00234
		OV	-0.049		0.445		0.154	0.015			BLCA	-0.335	3.8e-11			0.134	0.0102			BRCA-LumB	-0.447	7.56e-11			0.166	0.0217
		CESC	-0.081		0.178		0.143	0.017			LUSC	-0.083		0.0714		0.126	0.00599			HNSC	-0.285	1.13e-10			0.164	0.000261
		COAD	-0.059		0.239		0.141	0.0197			HNSC	-0.105	0.0199			0.114	0.0114			HNSC-HPV-	-0.28	1.18e-08			0.137	0.00605
		BRCA	-0.076	0.0161			0.138	1.26e-05			BRCA-Her2	-0.304	0.00886			0.191		0.107		ACC	0.19		0.104		0.203		0.0854
		BRCA-LumA	-0.057		0.197		0.12	0.00609			MESO	-0.084		0.442		0.169		0.122		READ	0.213	0.0115			0.171		0.107
		DLBC	-0.352	0.0221			0.192		0.228		COAD	-0.143	0.00392			0.103		0.0889		BRCA-Her2	-0.487	1.26e-05			0.144		0.227
		READ	0.021		0.809		0.179		0.0912		KIRP	-0.094		0.133		0.097		0.122		BLCA	-0.447	1.45e-19			0.081		0.12
		ACC	-0.017		0.884		0.166		0.161		LUAD	-0.094		0.246		0.093	0.0385			PAAD	0.012		0.881		0.077		0.315
		MESO	0.01		0.926		0.119		0.279		BRCA-Basal	-0.19	0.0119			0.081		0.285		BRCA	-0.471	3.44e-56			0.037		0.239
		BRCA-LumB	-0.134		0.0627		0.112		0.124		BRCA	-0.198	2.88e-10			0.076	0.0165			TGCT	0.19	0.0206			0.032		0.704
		BLCA	-0.104	0.0468			0.082		0.115		BRCA-LumA	-0.197	6.2e-06			0.069		0.119		KIRP	-0.134	0.0307			0.007		0.91
		HNSC-HPV+	-0.094		0.38		0.078		0.47		HNSC-HPV+	-0.201		0.0581		0.064		5.5ee-1		STAD	0.024		0.64		0.007		0.891
		ESCA	-0.194	0.00878			0.07		0.352		BRCA-LumB	-0.146	0.0424			0.06		0.41		KICH	-0.458	0.000111			0.005		0.967
		PRAD	-0.151	0.00203			0.044		0.366		UVM	0.038		0.738		0.026		0.826		PRAD	-0.216	8.92e-06			0.005		0.917
		KIRC	-0.042		0.37		0.04		0.391		THCA	0.029		0.521		0.022		0.634		UCS	-0.034		0.81		-0.27		0.0508
		PAAD	-0.017		0.829		0.036		0.642		UCS	0.221		0.109		0.015		0.913		CHOL	-0.244		0.151		-0.211		0.223
		BRCA-Her2	-0.036		0.762		0.025		0.835		CHOL	-0.193		0.258		-0.196		0.258		DLBC	-0.532	0.000289			-0.171		0.285
		PCPG	-0.047		0.541		0.019		0.806		GBM	0.018		0.83		-0.13		0.129		UVM	0.016		0.891		-0.157		0.173
		THCA	-0.02		0.652		0.017		0.701		UCEC	0.012		0.84		-0.119		0.269		ESCA	-0.262	0.000373			-0.142		0.0574
		STAD	-0.048		0.352		0.009		0.868		TGCT	0.436	2.98e-08			-0.095		0.253		SKCM-Primary	-0.295	0.00251			-0.103		0.302
		UCS	0.093		0.504		-0.183		0.19		PRAD	-0.369	6.8e-15			-0.092		0.0607		LGG	-0.06		0.188		-0.097	0.0334
		SKCM-Primary	0.038		0.702		-0.107		0.283		STAD	-0.057		0.269		-0.089		0.0841		THCA	-0.04		0.382		-0.072		0.113
		UCEC	0.03		0.606		-0.09		0.402		LGG	-0.053		0.244		-0.073		0.113		SKCM	-0.469	1.81e-26			-0.071		0.132
		KICH	-0.173		0.165		-0.077		0.54		SKCM	-0.132	0.00471			-0.071		0.132		PCPG	-0.489	1.77e-11			-0.07		0.369
		SKCM	0.018		0.709		-0.066		0.16		SKCM-Metastasis	-0.191	0.000293			-0.069		0.194		GBM	0.043		0.615		-0.066		0.445
		THYM	-0.128		0.171		-0.064		0.498		CESC	-0.171	0.00434			-0.045		0.452		SKCM-Metastasis	-0.515	1.79e-25			-0.066		0.213
		GBM	0.012		0.893		-0.061		0.48		SARC	0.214	0.000763			-0.038		0.555		OV	-0.387	2.42e-10			-0.052		0.412
		BRCA-Basal	-0.087		0.253		-0.055		0.468		OV	-0.216	0.000592			-0.032		0.616		CESC	-0.246	3.41e-05			-0.048		0.427
		CHOL	-0.151		0.379		-0.049		0.781		PCPG	-0.188	0.0147			-0.024		0.761		BRCA-LumA	0.502	2.09e-34			-0.046		0.299
		SKCM-Metastasis	0.013		0.802		-0.044		0.414		SKCM-Primary	0.102		0.307		-0.02		0.843		BRCA-Basal	-0.317	1.96e-05			-0.025		0.744
		LGG	0.02		0.667		-0.013		0.783		DLBC	-0.357	0.0201			-0.015		0.927		KIRC	0.006		0.895		-0.015		0.748
		KIRP	0.055		0.379		-0.009		0.88		ESCA	-0.235	0.00147			-0.01		0.889		LUSC	-0.35	3.35e-15			-0.013		0.784
			Macrophage M1 (OCT 1)									Macrophage M1 (OCT 2)									Macrophage M1 (OCT 3)
			The Tumor Purity				The Infiltrate					The Tumor Purity				The Infiltrate					The Tumor Purity				The Infiltrate
		Cancer Types	Rho	P-value			Rho	P-value			Cancer Types	Rho	P-value			Rho	P-value			Cancer Types	Rho	P-value			Rho	P-value
				Sig (<0.05)	Non-Sig (>0.05)			Sig (<0.05)	Non-Sig (>0.05)				Sig (<0.05)	Non-Sig (>0.05)			Sig (<0.05)	Non-Sig (>0.05)				Sig (<0.05)	Non-Sig (>0.05)			Sig (<0.05)	Non-Sig (>0.05)
		KICH	-0.173		0.165		-0.325	0.00828			THYM	-0.096		0.306		0.346	0.000154			KIRP	-0.134	0.0307			-0.311	3.43e-07
		DLBC	-0.352	0.0221			0.483	0.0014			UCEC	0.012		0.84		0.305	0.0038			LUAD	0.006		0.89		-0.258	5.94e-09
		LIHC	-0.041		0.443		0.172	0.00133			SARC	0.214	0.000763			0.211	0.000914			STAD	0.024		0.64		-0.129	0.0122
		LUAD	-0.09	0.0456			0.124	0.00598			KIRC	-0.002		0.971		0.172	0.0002			THYM	-0.04		0.674		0.389	1.76e-05
		BRCA-Her2	-0.036		0.762		0.195		0.1		THCA	0.029		0.521		0.172	0.000134			UCS	-0.034		0.81		0.292	0.0338
		UVM	-0.209		0.0669		0.153		0.185		SKCM-Metastasis	-0.191	0.000293			0.106	0.0468			THCA	-0.04		0.382		0.273	8.95e-10
		READ	0.021		0.809		0.144		0.176		OV	-0.216	0.000592			0		0.994		BLCA	-0.447	1.45e-19			0.214	3.52e-05
		SKCM	0.018		0.709		0.08		0.0877		UCS	0.221		0.109		0.212		0.127		BRCA-LumA	-0.502	2.09e-34			0.207	2.19e-06
		SKCM-Primary	0.038		0.702		0.08		0.425		ACC	-0.422	0.000179			0.184		0.119		SKCM-Metastasis	-0.515	1.79e-25			0.204	0.00011
		LGG	0.02		0.667		0.079		0.0853		CHOL	-0.193		0.258		0.145		0.406		SKCM	-0.469	1.81e-26			0.196	2.5e-05
		SKCM-Metastasis	0.013		0.802		0.079		0.137		ESCA	-0.235	0.00147			0.126		0.0932		SARC	0.304	1.26e-06			0.167	0.00888
		ESCA	-0.194	0.00878			0.07		0.35		BRCA-LumB	-0.146	0.0424			0.122		0.0928		BRCA	-0.471	3.44e-56			0.122	0.000111
		BLCA	-0.104	0.0468			0.06		0.25		PAAD	-0.025		0.749		0.12		0.118		UVM	0.016		0.891		0.181		0.114
		CHOL	-0.151		0.379		0.058		0.742		SKCM	-0.132	0.00471			0.093	0.0458			BRCA-Her2	-0.487	1.26e-05			0.15		0.208
		BRCA	-0.076	0.0161			0.044		0.165		BLCA	-0.335	3.8e-11			0.084		0.107		UCEC	-0.212	0.000248			0.149		0.167
		MESO	0.01		0.926		0.044		0.689		HNSC-HPV+	-0.201		0.0581		0.083		0.44		READ	0.213	0.0115			0.128		0.229
		KIRP	0.055		0.379		0.042		0.499		BRCA-Her2	-0.304	0.00886			0.076		0.524		BRCA-LumB	-0.447	7.56e-11			0.124		0.0868
		KIRC	-0.042		0.37		0.018		0.699		BRCA-LumA	-0.197	6.2e-06			0.069		0.115		SKCM-Primary	-0.295	0.00251			0.112		0.206
		COAD	-0.059		0.239		0.015		0.809		GBM	0.018		0.83		0.068		0.43		HNSC-HPV-	-0.28	1.18e-08			0.09		0.0724
		STAD	-0.048		0.352		0.015		0.765		LUAD	-0.052		0.246		0.06		0.185		LIHC	0.055		0.306		0.072		0.181
		PCPG	-0.047		0.541		0.007		0.931		SKCM-Primary	0.102		0.307		0.046		0.644		HNSC	-0.285	1.13e-10			0.064		0.156
		SARC	-0.009		0.887		0.005		0.942		BRCA	-0.198	2.88e-10			0.044		0.166		PCPG	-0.489	1.77e-11			0.033		0.669
		THYM	-0.128		0.171		-0.159		0.0903		LIHC	0.103		0.0561		0.041		0.451		BRCA-Basal	-0.317	1.96e-05			0.029		0.705
		TGCT	0.043		0.604		-0.127		0.125		MESO	-0.084		0.442		0.031		0.777		PAAD	0.012		0.881		0.013		0.868
		GBM	0.012		0.893		-0.11		0.203		LGG	-0.053		0.244		0.022		0.629		ESCA	-0.262	0.000373			0.012		0.877
		PRAD	-0.151	0.00203			-0.098	0.0463			READ	0.003		0.976		0.021		0.846		KIRC	0.006		0.895		0.01		0.83
		LUSC	-0.041		0.373		-0.082		0.074		LUSC	-0.083		0.0714		0.008		0.869		PRAD	-0.216		8.92e-06		0.002		0.964
		OV	-0.049		4.45r-1		-0.082		0.198		TGCT	0.436	2.98e-08			0.007		0.931		DLBC	-0.532	0.000289			-0.298		0.0583
		THCA	-0.02		0.653		-0.072		0.112		DLBC	-0.357	0.0201			-0.174		0.276		KICH	-0.458	0.000111			-0.122		0.334
		HNSC-HPV+	-0.094		0.38		-0.067		0.534		KIRP	-0.094		0.133		-0.118		0.0579		ACC	0.19		0.104		-0.121		0.309
		UCS	0.093		0.504		-0.059		0.676		PRAD	-0.369	6.8e-15			-0.093		0.0584		COAD	0.107	0.0315			-0.11		0.0694
		UCEC	0.03		0.606		-0.058		0.589		HNSC-HPV-	-0.104	0.038			-0.073		0.143		HNSC-HPV+	-0.198		0.062		-0.104		0.334
		PAAD	-0.017		0.829		-0.052		0.499		BRCA-Basal	-0.19	0.0119			-0.061		0.421		MESO	0.002		0.988		-0.1		0.361
		BRCA-Basal	-0.087		0.253		-0.04		0.604		PCPG	-0.188	0.0147			-0.054		0.489		LUSC	-0.35	3.35e-15			-0.099	0.0313
		ACC	-0.017		0.884		-0.038		0.747		COAD	-0.143	0.00392			-0.051		0.403		TGCT	0.19	0.0206			-0.095		0.253
		BRCA-LumB	-0.134		0.0627		-0.03		0.683		STAD	-0.057		0.269		-0.047		0.361		LGG	-0.06		0.188		-0.091		0.0777
		HNSC	-0.123	0.00612			-0.027		0.548		HNSC	-0.105	0.0199			-0.039		0.391		OV	-0.387	2.42e-10			-0.081		0.203
		HNSC-HPV-	-0.109	0.0286			-0.021		0.672		UVM	0.038		0.738		-0.024		0.834		CHOL	-0.244		0.151		-0.06		0.733
		BRCA-LumA	-0.057		0.197		-0.009		0.84		CESC	-0.171	0.00434			-0.012		0.844		CESC	-0.246	3.41e-05			-0.03		0.624
		CESC	-0.081		0.178		-0.001		0.992		KICH	-0.225		0.0689		-0.012		0.926		GBM	0.043		0.615		-0.019		0.827
			Macrophage M2 (OCT 1)									Macrophage M2 (OCT 2)									Macrophage M2 (OCT 3)
			The Tumor Purity				The Infiltrate					The Tumor Purity				The Infiltrate					The Tumor Purity				The Infiltrate
		Cancer Types	Rho	P-value			Rho	P-value			Cancer Types	Rho	P-value			Rho	P-value			Cancer Types	Rho	P-value			Rho	P-value
				Sig (<0.05)	Non-Sig (>0.05)			Sig (<0.05)	Non-Sig (>0.05)				Sig (<0.05)	Non-Sig (>0.05)			Sig (<0.05)	Non-Sig (>0.05)				Sig (<0.05)	Non-Sig (>0.05)			Sig (<0.05)	Non-Sig (>0.05)
		PRAD	-0.151	0.00203			-0.244	4.9e-07			LGG	-0.053		0.244		-0.206	5.62e-06			PRAD	-0.216	8.92e-06			-0.295	8.55e-10
		LUSC	-0.041		0.373		-0.107	0.0199			SARC	0.214	0.000763			-0.142	0.0263			BRCA-LumA	0.502	2.09e-34			-0.256	3.66e-09
		TGCT	0.043		0.604		0.182	0.027			SKCM-Metastasis	-0.191	0.000293			-0.133	0.0122			BRCA-LumB	-0.447	7.56e-11			-0.248	0.000514
		KICH	-0.173		0.165		0.137		0.275		TGCT	0.436	2.98e-08			0.47	1.84e-09			BRCA	-0.471	3.44e-56			-0.219	2.97e-12
		CHOL	-0.151		0.379		0.134		0.442		KIRP	-0.094		0.133		0.286	3.08e-06			THCA	-0.04		0.382		-0.18	6.13e-05
		BRCA-LumB	-0.134		0.0627		0.102		0.157		THYM	-0.096		0.306		0.281	0.00232			LGG	-0.06		0.188		-0.175	0.00012
		HNSC-HPV+	-0.094		0.38		0.097		0.368		READ	0.003		0.976		0.243	0.021			SKCM-Metastasis	-0.515	1.79e-25			-0.137	0.01
		READ	0.021		0.809		0.094		0.378		BLCA	-0.335	3.8e-11			0.128	0.0142			SARC	0.304	1.26e-06			-0.129	0.0438
		KIRP	0.055		0.379		0.093		0.135		KIRC	-0.002		0.971		0.109	0.0196			TGCT	0.19	0.0206			0.425	7.91e-08
		LGG	0.02		0.667		0.082		0.0743		CHOL	-0.193		0.258		0.118		0.5		THYM	-0.04		0.674		0.355	9.73e-05
		HNSC	-0.123	0.00612			0.062		0.167		STAD	-0.057		0.269		0.086		0.0964		READ	0.213	0.0115			0.213	0.0437
		SARC	-0.009		0.887		0.061		0.3444		CESC	-0.171	0.00434			0.066		0.27		LUSC	-0.35	3.35e-15			0.14	0.00212
		LIHC	-0.041		0.443		0.054		0.313		GBM	0.018		0.83		0.052		0.549		KIRC	0.006		0.895		0.122	0.00863
		ACC	-0.017		0.884		0.053		0.655		BRCA-Her2	-0.304	0.00886			0.046		0.699		UCS	0.034		0.81		0.17		0.225
		UVM	-0.209		0.0669		0.052		0.652		SKCM-Primary	0.102		0.307		0.043		0.667		HNSC-HPV+	-0.198		0.062		0.153		0.152
		CESC	-0.081		0.178		0.049		0.413		UVM	0.038		0.738		0.04		0.73		CHOL	-0.244		0.151		0.115		0.512
		BRCA-Basal	-0.087		0.253		0.045		0.559		BRCA-Basal	-0.19	0.0119			0.036		0.635		SKCM-Primary	-0.295	0.00251			0.112		0.264
		HNSC-HPV-	-0.109	0.0286			0.037		0.463		PRAD	-0.369	6.8e-15			0.036		0.459		KIRP	-0.134	0.0307			0.088		0.157
		SKCM-Metastasis	0.013		0.802		0.027		0.607		PCPG	-0.188	0.0147			0.028		0.723		CESC	-0.246	3.41e-05			0.067		0.268
		SKCM	0.018		0.709		0.025		0.598		UCS	0.221		0.109		0.021		0.882		OV	-0.387	2.42e-10			0.061		0.337
		OV	-0.049		0.445		0.024		0.709		COAD	-0.143	0.00392			0.015		0.809		LUAD	0.006		0.89		0.058		0.199
		GBM	0.012		0.893		0.02		0.813		PAAD	-0.025		0.749		0.001		0.992		ESCA	-0.262	0.000373			0.055		0.462
		PAAD	-0.017		0.829		0.018		0.815		HNSC-HPV+	-0.201		0.0581		-0.106		0.322		STAD	0.024		0.64		0.049		0.339
		UCEC	0.03		0.606		0.018		0.866		THCA	0.029		0.521		-0.1	0.0269			MESO	0.002		0.988		0.03		0.784
		UCS	0.093		0.504		0.012		0.93		LUSC	-0.083		0.0714		-0.091	0.0477			DLBC	-0.532	0.000289			0.027		0.866
		THYM	-0.128		0.171		-0.148		0.115		SKCM	-0.132	0.00471			-0.087		0.0617		PCPG	-0.489	1.77e-11			0.024		0.754
		BRCA-Her2	-0.036		0.762		-0.146		0.221		KICH	-0.225		0.0689		-0.08		0.526		BLCA	-0.447	1.45e-19			0.011		0.835
		ESCA	-0.194	0.00878			-0.09		0.228		LUAD	-0.052		0.246		-0.078		0.0849		BRCA-Basal	-0.317	1.96e-05			0.009		0.905
		BRCA	-0.076	0.0161			-0.081	0.0111			ESCA	-0.235	0.00147			-0.065		0.383		GBM	0.043		0.615		0.008		0.926
		BLCA	-0.104	0.0468			-0.072		0.169		MESO	-0.084		0.442		-0.055		0.617		HNSC	-0.285	1.13e-10			0.004		0.922
		MESO	0.01		0.926		-0.067		0.542		BRCA-LumA	-0.197	6.2e-06			-0.044		0.324		BRCA-Her2	-0.487	1.26e-05			-0.119		0.32
		PCPG	-0.047		0.541		-0.065		0.407		BRCA	-0.198	2.88e-10			-0.039		0.219		SKCM	-0.469	1.81e-26			-0.083		0.0755
		LUAD	-0.09	0.0456			-0.057		0.204		HNSC	-0.105	0.0199			-0.036		0.423		ACC	0.19		0.104		-0.073		0.542
		BRCA-LumA	-0.057		0.197		-0.052		0.239		LIHC	0.103		0.0561		-0.035		0.513		UVM	0.016		0.891		-0.059		0.608
		KIRC	-0.042		0.37		-0.045		0.337		ACC	-0.422	0.000179			-0.034		0.772		PAAD	0.012		0.881		0.057		0.457
		COAD	-0.059		0.239		-0.023		0.702		OV	-0.216		0.592		-0.031		0.624		HNSC-HPV-	-0.28	1.18e-08			-0.049		0.332
		STAD	-0.048		0.352		-0.019		0.712		BRCA-LumB	-0.146	0.0424			-0.03		0.681		LIHC	0.055		0.306		-0.048		0.374
		SKCM-Primary	0.038		0.702		-0.018		0.857		DLBC	-0.357	0.0201			-0.021		0.896		KICH	-0.458	0.000111			-0.042		0.74
		THCA	-0.02		0.653		-0.016		0.721		HNSC-HPV-	-0.104	0.038			-0.02		0.684		COAD	0.107	0.0315			-0.006		0.924
		DLBC	-0.352	0.0221			-0.006		0.97		UCEC	0.012		0.84		-0.009		0.93		UCEC	-0.212	0.000248			-0.002		0.989
			Monocyte (OCT 1)									Monocyte (OCT 2)									Monocyte (OCT 3)
			The Tumor Purity				The Infiltrate					The Tumor Purity				The Infiltrate					The Tumor Purity				The Infiltrate
		Cancer Types	Rho	P-value			Rho	P-value			Cancer Types	Rho	P-value			Rho	P-value			Cancer Types	Rho	P-value			Rho	P-value
				Sig (<0.05)	Non-Sig (>0.05)			Sig (<0.05)	Non-Sig (>0.05)				Sig (<0.05)	Non-Sig (>0.05)			Sig (<0.05)	Non-Sig (>0.05)				Sig (<0.05)	Non-Sig (>0.05)			Sig (<0.05)	Non-Sig (>0.05)
		SARC	-0.009		0.887		-0.22	0.000549			BRCA-LumB	-0.146	0.0424			-0.18	0.0123			MESO	0.002		0.988		-0.247	0.0227
		MESO	0.01		0.926		-0.214	0.0497			KICH	-0.225		0.0689		0.216		0.0837		KIRP	-0.134	0.0307			-0.143	0.022
		HNSC-HPV-	-0.109	0.0286			-0.146	0.0035			GBM	0.018		0.83		0.153		0.0742		LUAD	0.006		0.89		0.229	2.82e-07
		BRCA-LumB	-0.134		0.0627		-0.145	0.0441			TGCT	0.436	2.98e-08			0.097		0.243		LIHC	0.055		0.306		0.199	0.000198
		BRCA-LumA	-0.057		0.197		-0.109	0.013			ESCA	-0.235	0.00147			0.096		0.199		LGG	-0.06		0.188		0.198	1.31e-05
		HNSC	-0.123	0.00612			-0.104	0.0209			KIRC	-0.002		0.971		0.094	0.0436			LUSC	-0.35	3.35e-15			0.161	0.000431
		UVM	-0.209		0.0669		0.273	0.0161			COAD	-0.143	0.00392			0.091		0.134		SARC	0.304	1.26e-06			0.155	0.0157
		BRCA-Her2	-0.036		0.762		0.24	0.0426			STAD	-0.057		0.269		0.082		0.113		OV	-0.387	2.42e-10			0.127	0.0453
		PRAD	-0.151	0.00203			0		0.994		LGG	-0.053		0.244		0.058		0.205		BLCA	-0.447	1.45e-19			0.104	0.0471
		UCEC	0.03		0.606		0.179		0.0951		LIHC	0.103		0.0561		0.057		0.291		UCEC	-0.212	0.000248			0.208		0.0517
		CHOL	-0.151		0.379		0.172		0.322		CESC	-0.171	0.00434			0.056		0.351		GBM	0.043		0.615		0.151		0.0789
		BRCA-Basal	-0.087		0.253		0.137		0.0717		BRCA-Basal	-0.19	0.0119			0.054		0.481		TGCT	0.19	0.0206			0.116		0.161
		HNSC-HPV+	-0.094		0.38		0.103		0.337		PAAD	-0.025		0.749		0.047		0.542		UVM	0.016		0.891		0.102		0.375
		GBM	0.012		0.893		0.077		0.369		SARC	0.214	0.000763			0.036		0.578		UCS	-0.034		0.81		0.095		0.5
		OV	-0.049		0.445		0.064		0.318		UCEC	0.012		0.84		0.034		0.751		DLBC	-0.532	0.000289			0.091		0.573
		READ	0.021		0.809		0.057		0.592		CHOL	-0.193		0.258		0.022		0.902		CHOL	-0.244		0.151		0.053		0.761
		SKCM-Primary	0.038		0.702		0.053		0.594		PCPG	-0.188	0.0147			0.003		0.974		ACC	0.19		0.104		0.048		0.687
		KICH	-0.173		0.165		0.048		0.707		SKCM-Primary	0.102		0.307		0.003		0.975		BRCA-Basal	-0.317	1.96e-05			0.048		0.528
		LIHC	-0.041		0.443		0.036		0.507		UCS	0.221		0.109		-0.238		0.0858		STAD	0.024		0.64		0.045		0.38
		COAD	-0.059		0.239		0.028		0.65		MESO	-0.084		0.442		-0.203		0.0626		CESC	-0.246	3.41e-05			0.024		0.688
		ACC	-0.017		0.884		0.017		0.885		BRCA-Her2	-0.304	0.00886			-0.169		0.156		HNSC-HPV+	-0.198		0.062		0.008		0.942
		SKCM	0.018		0.709		0.017		0.717		THYM	-0.096		0.306		-0.159		0.0905		BRCA-Her2	-0.487	1.26e-05			-0.175		0.142
		THYM	-0.128		0.171		0.012		0.902		DLBC	-0.357	0.0201			-0.149		0.354		READ	0.213	0.0115			-0.168		0.113
		LUAD	-0.09	0.0456			0.01		0.828		HNSC-HPV-	-0.104	0.038			-0.1	0.0448			BRCA-LumB	-0.447	7.56e-11			-0.138		0.057
		STAD	-0.048		0.352		0.009		0.856		HNSC-HPV+	-0.201		0.0581		-0.096		0.372		PCPG	-0.489	1.77e-11			-0.11		0.156
		SKCM-Metastasis	0.013		0.802		0.007		0.9		HNSC	-0.105	0.0199			-0.093	0.0387			THCA	-0.04		0.382		-0.1	0.0279
		BLCA	-0.104	0.0468			0.004		0.934		BRCA	-0.198	2.88e-10			-0.087	0.00604			SKCM-Metastasis	-0.515	1.79e-25			-0.092		0.0853
		UCS	0.093		0.504		-0.186		0.182		BRCA-LumA	-0.197	6.2e-06			-0.081		0.0661		SKCM-Primary	-0.295	0.00251			-0.091		0.365
		DLBC	-0.352	0.0221			-0.164		0.306		LUSC	-0.083		0.0714		-0.081		0.0755		SKCM	-0.469	1.81e-26			-0.09		0.0555
		TGCT	0.043		0.604		-0.109		0.189		BLCA	-0.335	3.8e-11			-0.08		0.126		HNSC-HPV-	-0.28	1.18e-08			-0.053		0.288
		PCPG	-0.047		0.541		-0.092		0.235		THCA	0.029		0.521		-0.08		0.0759		PAAD	0.012		0.881		-0.044		0.57
		LUSC	-0.041		0.373		-0.082		0.0731		OV	-0.216	0.000592			-0.075		0.241		HNSC	-0.285	1.13e-10			-0.043		0.341
		CESC	-0.081		0.178		-0.072		0.233		ACC	-0.422	0.000179			-0.046		0.698		PRAD	-0.216	8.92e-06			-0.038		0.442
		THCA	-0.02		0.653		-0.05		0.269		READ	0.003		0.976		-0.04		0.708		BRCA	-0.471	3.44e-56			-0.037		0.243
		BRCA	-0.076	0.0161			-0.045		0.155		KIRP	-0.094		0.133		-0.037		0.558		THYM	-0.04		0.674		-0.031		0.739
		ESCA	-0.194	0.00878			-0.039		0.607		LUAD	-0.052		0.246		-0.037		0.407		ESCA	-0.262	0.000373			-0.022		0.767
		PAAD	-0.017		0.829		-0.032		0.682		SKCM-Metastasis	-0.191	0.000293			-0.021		0.689		COAD	0.107	0.0315			-0.021		0.73
		KIRC	-0.042		0.37		-0.018		0.694		UVM	0.038		0.738		-0.011		0.925		KIRC	0.006		0.895		-0.02		0.667
		KIRP	0.055		0.379		-0.003		0.961		SKCM	-0.132	0.00471			-0.005		0.913		BRCA-LumA	-0.502	2.09e-34			-0.015		0.725
		LGG	0.02		0.667		-0.001		0.982		PRAD	-0.369	6.8e-15			-0.003		0.95		KICH	-0.458	0.000111			-0.009		0.942
			Natural Killer (OCT 1)									Natural Killer (OCT 2)									Natural Killer (OCT 3)
			The Tumor Purity				The Infiltrate					The Tumor Purity				The Infiltrate					The Tumor Purity				The Infiltrate
		Cancer Types	Rho	P-value			Rho	P-value			Cancer Types	Rho	P-value			Rho	P-value			Cancer Types	Rho	P-value			Rho	P-value
				Sig (<0.05)	Non-Sig (>0.05)			Sig (<0.05)	Non-Sig (>0.05)				Sig (<0.05)	Non-Sig (>0.05)			Sig (<0.05)	Non-Sig (>0.05)				Sig (<0.05)	Non-Sig (>0.05)			Sig (<0.05)	Non-Sig (>0.05)
		TGCT	0.043		0.604		-0.225	0.00615			BRCA-Basal	-0.19	0.0119			-0.215	0.00438			HNSC-HPV+	-0.198		0.062		-0.224	0.0348
		OV	-0.049		0.445		-0.175	0.00549			KIRP	-0.094		0.133		-0.171	0.00587			COAD	0.107	0.0315			-0.189	0.00166
		KIRC	-0.042		0.37		0.126	0.00688			BRCA	-0.198	2.88e-10			-0.111	0.000436			BRCA-Basal	-0.317	1.96e-05			-0.163	0.0319
		ESCA	-0.194	0.00878			0		1		THYM	-0.096		0.306		0.282	0.00223			THYM	-0.04		0.674		0.245	0.00821
		UCS	0.093		0.504		0.226		0.104		SARC	0.214	0.000763			0.167	0.00913			UVM	0.016		0.891		0.242	0.0341
		BRCA-Her2	-0.036		0.762		0.18		0.13		DLBC	-0.357	0.0201			0.153		0.338		SARC	0.304	1.26e-06			0.205	0.0013
		READ	0.021		0.809		0.139		0.191		TGCT	0.436	2.98e-08			0.137		0.0975		CESC	-0.246	3.41e-05			0.184	0.00209
		SKCM-Primary	0.038		0.702		0.121		0.225		CESC	-0.171	0.00434			0.109		0.0689		DLBC	-0.532	0.000289			0		0.998
		CESC	-0.081		0.178		0.093		0.123		GBM	0.018		0.83		0.087		0.312		ESCA	-0.262	0.000373			0		0.998
		UVM	-0.209		0.0669		0.075		0.518		SKCM-Primary	0.102		0.307		0.08		0.425		BLCA	-0.447	1.45e-19			0.098		0.0593
		SKCM	0.018		0.709		0.073		0.121		OV	-0.216	0.000592			0.07		0.273		THCA	-0.04		0.382		0.09	0.0469
		PCPG	-0.047		0.541		0.069		0.379		LGG	-0.053		0.244		0.056		0.224		READ	0.213	0.0115			0.077		0.471
		SKCM-Metastasis	0.013		0.802		0.055		0.3		MESO	-0.084		0.442		0.056		0.609		LGG	-0.06		0.188		0.067		0.144
		UCEC	0.03		0.606		0.048		0.657		LIHC	0.103		0.0561		0.045		0.406		GBM	0.043		0.615		0.055		0.522
		THCA	-0.02		0.653		0.045		0.321		HNSC-HPV+	-0.201		0.0581		0.039		0.715		SKCM-Metastasis	-0.515	1.79e-25			0.034		0.525
		LUSC	-0.041		0.373		0.042		0.364		ESCA	-0.235	0.00147			0.022		0.765		LIHC	0.0055		0.366		0.029		0.59
		LUAD	-0.09	0.0456			0.037		0.409		CHOL	-0.193		0.258		0.02		0.91		HNSC-HPV-	-0.28	1.18e-08			0.028		0.573
		SARC	-0.009		0.887		0.036		0.577		LUAD	-0.052		0.246		0.02		0.666		SKCM	-0.469	1.81e-26			0.003		0.946
		KIRP	0.055		0.379		0.015		0.807		SKCM	-0.132	0.00471			0.015		0.757		BRCA-Her2	-0.487	1.26e-05			-0.198		0.0956
		PRAD	-0.151	0.00203			0.004		0.936		THCA	0.029		0.521		0.006		0.891		MESO	0.002		0.988		-0.166		0.128
		ACC	-0.017		0.884		0.001		0.993		ACC	-0.422	0.000179			-0.152		0.198		TGCT	0.19	0.0206			-0.148		0.0727
		THYM	-0.128		0.171		-0.156		0.0961		BRCA-Her2	-0.304	0.00886			-0.15		0.208		BRCA-LumB	-0.447	7.56e-11			-0.123		0.0899
		HNSC-HPV+	-0.094		0.38		-0.118		0.272		PCPG	-0.188	0.0147			-0.131		0.0915		KICH	-0.458	0.000111			-0.115		0.363
		KICH	-0.173		0.165		-0.103		0.412		PAAD	-0.025		0.749		-0.125		0.102		UCS	-0.034		0.81		-0.105		0.454
		DLBC	-0.352	0.0221			-0.089		0.579		BRCA-LumB	-0.146	0.0424			-0.113		0.118		PRAD	-0.216	8.92e-06			-0.1	0.0419
		BRCA-LumB	-0.134		0.0627		-0.075		0.303		KICH	-0.225		0.0689		-0.102		0.421		ACC	0.19		0.104		-0.088		0.459
		MESO	0.01		0.926		-0.068		0.535		UVM	0.038		0.738		-0.093		0.422		PCPG	-0.489	1.77e-11			-0.086		0.27
		LIHC	-0.041		0.443		-0.058		0.281		UCEC	0.012		0.84		-0.08		0.46		BRCA	-0.471	3.44e-56			-0.07	0.0283
		HNSC	-0.123	0.00612			-0.054		0.229		HNSC-HPV-	-0.104	0.038			-0.077		0.126		SKCM-Primary	-0.295	0.00251			-0.065		0.515
		PAAD	-0.017		0.829		-0.047		0.537		READ	0.003		0.976		-0.067		0.531		KIRP	-0.134	0.0307			-0.058		0.35
		BRCA-Basal	-0.087		0.253		-0.038		0.622		BRCA-LumA	-0.197	6.2e-06			-0.061		0.167		OV	-0.387	2.42e-10			-0.057		0.373
		CHOL	-0.151		0.379		-0.036		0.838		HNSC	-0.105	0.0199			-0.054		0.234		STAD	0.024		0.64		-0.057		0.27
		LGG	0.02		0.667		-0.035		0.45		BLCA	-0.335	3.8e-11			-0.046		0.377		UCEC	-0.212	0.000248			-0.053		0.624
		HNSC-HPV-	-0.109	0.0286			-0.027		0.595		LUSC	-0.083		0.0714		-0.044		0.34		PAAD	0.012		0.881		-0.046		0.55
		BRCA-LumA	-0.057		0.197		-0.021		0.634		PRAD	-0.369	6.8e-15			-0.041		0.406		LUAD	0.006		0.89		-0.039		0.387
		STAD	-0.048		0.352		-0.02		0.693		KIRC	-0.002		0.971		-0.037		0.43		KIRC	0.006		0.895		-0.033		0.486
		GBM	0.012		0.893		-0.017		0.847		UCS	0.221		0.109		-0.036		0.797		HNSC	-0.285	1.13e-10			-0.025		0.586
		BRCA	-0.076	0.0161			-0.003		0.932		COAD	-0.143	0.00392			-0.022		0.711		CHOL	-0.244		0.151		-0.015		0.932
		BLCA	-0.104	0.0468			-0.001		0.98		STAD	-0.057		0.269		-0.017		0.736		LUSC	-0.35	3.35e-15			-0.003		0.95
		COAD	-0.059		2.39		-0.036		0.555		SKCM-Metastasis	-0.191	0.000293			-0.006		0.908		BRCA-LumA	0.502	2.09e-34			-0.002		0.967
			Mast Cell (OCT 1)									Mast Cell (OCT 2)									Mast Cell (OCT 3)
			The Tumor Purity				The Infiltrate					The Tumor Purity				The Infiltrate					The Tumor Purity				The Infiltrate
		Cancer Types	Rho	P-value			Rho	P-value			Cancer Types	Rho	P-value			Rho	P-value			Cancer Types	Rho	P-value			Rho	P-value
				Sig (<0.05)	Non-Sig (>0.05)			Sig (<0.05)	Non-Sig (>0.05)				Sig (<0.05)	Non-Sig (>0.05)			Sig (<0.05)	Non-Sig (>0.05)				Sig (<0.05)	Non-Sig (>0.05)			Sig (<0.05)	Non-Sig (>0.05)
		ESCA	-0.194	0.00878			-0.21	0.00457			READ	0.003		0.976		-0.228	0.031			ACC	0.19		0.104		-0.243	0.038
		SARC	-0.009		0.887		-0.193	0.00241			BRCA-LumB	-0.146	0.0424			-0.162	0.0246			GBM	0.043		0.615		-0.192	0.025
		BRCA	-0.076	0.0161			-0.162	2.73e-07			LGG	-0.053		0.244		-0.133	0.0037			LUAD	0.006		0.89		0.413	9.21e-22
		HNSC-HPV-	-0.109	0.0286			-0.159	0.00139			UCEC	0.012		0.84		0.281	0.00806			BRCA-Basal	-0.317	1.96e-05			0.352	1.89e-06
		HNSC	-0.123	0.00612			-0.145	0.0013			PAAD	-0.025		0.749		0.254	0.000812			SARC	0.304	1.26e-06			0.278	1.05e-05
		KIRC	-0.042		0.37		-0.141	0.00241			STAD	-0.057		0.269		0.143	0.00525			UCEC	-0.212	0.000248			0.25	0.0189
		LIHC	-0.041		0.442		0.132	0.0142			SARC	0.214	0.000763			0.14	0.0288			BLCA	-0.447	1.45e-19			0.221	1.82e-05
		COAD	-0.059		0.239		0.122	0.0441			SKCM-Metastasis	-0.191	0.000293			0.104	0.0497			STAD	0.024		0.64		0.211	3.41e-05
		BRCA-Basal	-0.087		0.253		0.12		0.116		KICH	-0.225		0.0689		0.105		0.407		SKCM-Primary	-0.295	0.00251			0.204	0.04
		DLBC	-0.352	0.0221			0.112		0.487		THYM	-0.096		0.306		0.104		0.268		KIRP	-0.134	0.0307			0.202	0.00108
		UCEC	0.03		0.606		0.112		0.298		KIRC	-0.002		0.971		0.1	0.0319			LUSC	-0.35	3.35e-15			0.201	9.37e-06
		TGCT	0.043		0.604		0.099		0.231		LIHC	0.103		0.0561		0.085		0.115		SKCM	-0.469	1.81e-26			0.144	0.00208
		LGG	0.02		0.667		0.097	0.0334			SKCM	-0.132	0.00471			0.078		0.0948		OV	-0.387	2.42e-10			0.128	0.0433
		THCA	-0.02		0.653		0.065		0.151		HNSC-HPV+	-0.201		0.0581		0.071		0.506		SKCM-Metastasis	-0.515	1.79e-25			0.125	0.0184
		CHOL	-0.151		0.379		0.042		0.811		UVM	0.038		0.738		0.068		0.554		KIRC	0.006		0.895		0.114	0.0142
		PAAD	-0.017		0.829		0.042		0.587		BRCA-Basal	-0.19		0.0119		0.066		0.387		BRCA-LumA	-0.502	2.09e-34			0		0.996
		UVM	-0.209		0.0669		0.041		0.726		OV	-0.216	0.000592			0.062		0.331		READ	0.213	0.0115			0.156		0.143
		CESC	-0.081		0.178		0.019		0.755		BLCA	-0.335	3.8e-11			0.056		0.288		CHOL	-0.244		0.151		0.14		0.423
		PRAD	-0.151	0.00203			0.01		0.845		CESC	-0.171	0.00434			0.042		0.488		TGCT	0.19	0.0206			0.123		0.137
		SKCM-Primary	0.038		0.702		0.004		0.967		PRAD	-0.369	6.8e-15			0.042		0.398		UVM	0.016		0.891		0.103		0.371
		STAD	-0.048		0.352		0.004		0.938		COAD	-0.143	0.00392			0.037		0.543		PRAD	-0.216	8.92e-06			0.084		0.0869
		KICH	-0.173		0.165		0.001		0.996		HNSC	-0.105	0.0199			0.03		0.504		COAD	0.107	0.0315			0.083		0.168
		BRCA-Her2	-0.036		0.762		-0.108		0.366		TGCT	0.436	2.98e-08			0.02		0.806		ESCA	-0.262	0.000373			0.07		0.352
		MESO	0.01		0.926		-0.106		0.336		LUSC	-0.083		0.0714		0.017		0.705		LIHC	0.055		0.306		0.057		0.292
		BRCA-LumB	-0.134		0.0627		-0.099		0.171		HNSC-HPV-	-0.104	0.038			0.008		0.877		CESC	-0.246	3.41e-05			0.027		0.66
		BRCA-LumA	-0.057		0.197		-0.098	0.0263			KIRP	-0.094		0.133		0.005		0.941		PAAD	0.012		0.881		0.024		0.753
		UCS	0.093		0.504		-0.084		0.549		BRCA-LumA	-0.197	6.2e-06			0.003		0.947		KICH	-0.458	0.000111			0.02		0.875
		LUAD	-0.09	0.0456			-0.063		0.159		DLBC	-0.357	0.0201			-0.244		0.125		UCS	-0.034		0.81		0.007		0.963
		PCPG	-0.047		0.541		-0.053		0.493		BRCA-Her2	-0.304	0.00886			-0.171		0.151		DLBC	-0.532	0.000289			-0.188		0.24
		HNSC-HPV+	-0.094		0.38		-0.049		0.649		MESO	-0.084		0.442		-0.104		0.342		MESO	0.002		0.988		-0.105		0.338
		OV	-0.049		0.445		-0.049		0.442		LUAD	-0.052		0.246		-0.092	0.0407			LGG	-0.06		0.188		-0.097	0.034
		BLCA	-0.104	0.0468			-0.048		0.363		PCPG	-0.188	0.0147			-0.084		0.28		PCPG	-0.489	1.77e-11			-0.078		0.318
		GBM	0.012		0.893		-0.039		0.647		ACC	-0.422	0.000179			-0.076		0.522		BRCA-LumB	-0.447	7.56e-11			-0.065		0.368
		READ	0.021		0.809		-0.024		0.821		GBM	0.018		0.83		-0.075		0.381		HNSC-HPV+	-0.198		0.062		-0.056		0.602
		ACC	-0.017		0.884		-0.02		0.867		ESCA	-0.235	0.00147			-0.056		0.458		THCA	-0.04		0.382		-0.055		0.227
		LUSC	-0.041		0.373		-0.02		0.656		BRCA	-0.198	2.88e-10			-0.049		0.125		BRCA-Her2	-0.487	1.26e-05			-0.053		0.661
		THYM	-0.128		0.171		-0.01		0.913		THCA	0.029		0.521		-0.047		0.3		HNSC	-0.285	1.13e-10			-0.022		0.622
		KIRP	0.055		0.379		-0.009		0.888		SKCM-Primary	0.102		0.307		-0.027		0.791		BRCA	-0.471	3.44e-56			-0.007		0.827
		SKCM-Metastasis	0.013		0.802		-0.009		0.86		CHOL	-0.193		0.258		-0.004		0.98		HNSC-HPV-	-0.28	1.18e-08			-0.003		0.956
		SKCM	0.018		0.709		-0.004		0.935		UCS	-0.221		0.109		-0.004		0.977		THYM	-0.04		0.674		-0.001		0.992
			Dendritic Cell (OCT 1)									Dendritic Cell (OCT 2)									Dendritic Cell (OCT 3)
			The Tumor Purity				The Infiltrate					The Tumor Purity				The Infiltrate					The Tumor Purity				The Infiltrate
		Cancer Types	Rho	P-value			Rho	P-value			Cancer Types	Rho	P-value			Rho	P-value			Cancer Types	Rho	P-value			Rho	P-value
				Sig (<0.05)	Non-Sig (>0.05)			Sig (<0.05)	Non-Sig (>0.05)				Sig (<0.05)	Non-Sig (>0.05)			Sig (<0.05)	Non-Sig (>0.05)				Sig (<0.05)	Non-Sig (>0.05)			Sig (<0.05)	Non-Sig (>0.05)
		MESO	0.01		0.926		-0.388	0.00024			UCS	-0.221		0.109		-0.289	0.0358			MESO	0.002		0.988		-0.295	0.00621
		KIRP	0.055		0.379		-0.166	0.00765			HNSC-HPV+	-0.201		0.0581		-0.211	0.0472			BLCA	-0.447	1.45e-19			-0.205	7.64e-05
		LUAD	-0.09	0.0456			-0.164	0.000253			SKCM-Primary	0.102		0.307		-0.199	0.0454			GBM	0.043		0.615		-0.195	0.0225
		KIRC	-0.042		0.37		-0.112	0.0164			BLCA	-0.335	3.8e-11			-0.187	0.000303			THCA	-0.04		0.382		-0.152	0.000758
		ESCA	-0.194	0.00878			0.2	0.0071			BRCA-LumB	-0.146	0.0424			-0.184	0.0106			KIRP	-0.134	0.0307			-0.134	0.0312
		UVM	-0.209		0.0669		\	\	\		KIRP	-0.094		0.133		-0.176	0.00453			LUAD	0.006		0.89		0.19	2.11e-05
		DLBC	-0.352	0.0221			0.267		0.0915		HNSC	-0.105	0.0199			-0.139	0.00196			UVM	0.016		0.891		\	\	\
		HNSC-HPV+	-0.094		0.38		0.125		0.243		HNSC-HPV-	-0.104	0.038			-0.118	0.0178			ACC	0.19		0.104		0.21		0.0743
		UCS	0.093		0.504		0.09		0.52		UVM	0.038		0.738		\	\	\		THYM	-0.04		0.674		0.155		0.0985
		ACC	-0.017		0.884		0.061		0.606		TGCT	0.436	2.98e-08			0.095		0.254		STAD	0.024		0.64		0.069		0.181
		STAD	-0.048		0.352		0.058		0.258		PRAD	-0.369	6.8e-15			0.069		0.163		SARC	0.204	1.26e-06			0.059		0.361
		PCPG	-0.047		0.541		0.04		0.609		PCPG	-0.188	0.0147			0.064		0.413		SKCM-Primary	-0.295	0.00251			0.055		0.58
		BRCA-Basal	-0.087		0.253		0.039		0.611		THYM	-0.096		0.306		0.064		0.496		LUSC	-0.35	3.35e-15			0.051		0.266
		BRCA	-0.076	0.0161			0.038		0.231		COAD	-0.143	0.00392			0.029		0.627		OV	-0.387	2.42e-10			0.045		0.483
		HNSC	-0.123	0.00612			0.031		0.489		SARC	0.214	0.000763			0.028		0.667		ESCA	-0.262	0.000372			0.044		0.56
		PRAD	-0.151	0.00203			0.028		0.563		LUAD	-0.052		0.246		0.027		0.55		LIHC	0.055		0.306		0.038		0.484
		HNSC-HPV-	-0.109	0.0286			0.01		0.847		STAD	-0.057		0.269		0.02		0.701		CESC	-0.246	3.41e-05			0.018		0.76
		CHOL	-0.151		0.379		-0.234		0.176		OV	-0.216	0.000592			0.017		0.792		TGCT	0.19	0.0206			0.017		0.839
		UCEC	0.03		0.606		-0.182		0.0895		SKCM-Metastasis	-0.191	0.000293			0.01		0.855		HNSC	-0.285	1.13e-10			0.013		0.767
		SKCM-Primary	0.038		0.702		-0.157		0.114		CHOL	-0.193		0.258		0.007		0.967		HNSC-HPV+	-0.198		0.062		0.013		0.901
		TGCT	0.043		0.604		-0.125		0.132		BRCA-LumA	-0.197	6.2e-06			0.003		0.943		HNSC-HPV-	-0.28	1.18e-08			0.005		0.914
		READ	0.021		0.809		-0.121		0.257		LIHC	0.103		0.0561		0.001		0.987		DLBC	-0.532	0.000289			-0.199		0.213
		SARC	-0.009		0.887		-0.114		0.0756		UCEC	0.012		0.84		-0.199		0.0635		UCEC	-0.212	0.000248			-0.198		0.0646
		GBM	0.012		0.893		-0.11		0.2		KICH	-0.225		0.0689		-0.189		0.131		UCS	-0.034		0.81		-0.181		0.195
		OV	-0.049		0.445		-0.099		0.119		READ	0.003		0.976		-0.168		0.114		PCPG	-0.489	1.77e-11			-0.134		0.0848
		KICH	-0.173		0.165		-0.088		0.486		BRCA-Her2	-0.304	0.00886			-0.16		0.181		KICH	-0.458	0.000111			-0.122		0.333
		SKCM	0.018		0.709		-0.076		0.104		MESO	-0.084		0.442		-0.137		0.212		BRCA-Her2	-0.487	1.26e-05			-0.117		0.328
		BRCA-LumB	-0.134		0.0627		-0.064		0.378		GBM	0.018		0.83		-0.11		0.201		BRCA-LumB	-0.447	7.56e-11			-0.112		0.122
		THCA	-0.02		0.653		-0.064		0.16		LUSC	-0.083		0.0714		-0.093	0.0427			CHOL	-0.244		0.151		-0.104		0.55
		PAAD	-0.017		0.829		-0.06		0.433		KIRC	-0.002		0.971		-0.092	0.0494			PAAD	0.012		0.881		-0.102		0.184
		SKCM-Metastasis	0.013		0.802		-0.06		0.263		CESC	-0.171	0.00434			-0.088		0.146		READ	0.213	0.0115			-0.093		0.383
		THYM	-0.128		0.171		-0.054		0.566		PAAD	-0.025		0.749		-0.074		0.336		PRAD	-0.216	8.92e-06			-0.83		0.0902
		LUSC	-0.041		0.373		-0.053		0.252		THCA	0.029		0.521		-0.07		0.125		BRCA-LumA	-0.502	2.09e-34			-0.082		0.0623
		CESC	-0.081		0.178		-0.03		0.615		SKCM	-0.132	0.00471			-0.069		0.139		BRCA-Basal	-0.317	1.96e-05			-0.069		0.363
		BRCA-Her2	-0.036		0.762		-0.022		0.852		DLBC	-0.357	0.0201			-0.05		0.755		BRCA	-0.471	3.44e-56			-0.057		0.073
		BLCA	-0.104	0.0468			-0.02		0.696		BRCA	-0.198	2.88e-10			-0.047		0.141		SKCM-Metastasis	-0.515	1.79e-25			-0.046		0.393
		BRCA-LumA	-0.057		0.197		-0.014		0.75		BRCA-Basal	-0.19	0.0119			-0.019		0.801		COAD	0.107	0.0315			-0.037		0.543
		COAD	-0.059		0.239		-0.012		0.846		LGG	-0.053		0.244		-0.014		0.757		LGG	-0.06		0.188		-0.019		0.683
		LIHC	-0.041		0.443		-0.007		0.891		ESCA	-0.235	0.00147			-0.01		0.892		SKCM	-0.469	1.81e-26			-0.016		0.735
		LGG	0.02		0.667		-0.004		0.928		ACC	-0.422	0.000179			-0.006		0.961		KIRC	0.006		0.895		-0.015		0.752
