# Supplementary material for: Modulatory effect of metformin and its transporters on immune infiltration in tumor microenvironment: a bioinformatic study with experimental validation
Source: Discov Oncol. 2025 May 31;16:973. doi: 10.1007/s12672-025-02766-y (PMC12126455; doi:10.1007/s12672-025-02766-y)
Supplement: Supplementary file 2 — Additional file2 [file 12672_2025_2766_MOESM2_ESM.xlsx]

## Sheet: Sheet1
				Supplementary file 2		Tumors showing positive correlation of OCT genes expressions
						with 14 immune infiltrates in 32 types of tumor of TCGA data
						A) Immune infiltrates with highest frequency of presence.
						B) Tumor types with highest frequency of presence.
			A)	Tumor Types						B)	Immune Infiltrates
			Immune Infiltrates	(OCT 1)	(OCT 2)	(OCT 3)	TOTAL			Tumor Types	(OCT 1)	(OCT 2)	(OCT 3)	TOTAL
		1	Mast Cell	LIHC, COAD, LGG	UCEC, PAAD, STAD, SARC, SKCM-Metastasis, KIRC	LUAD, BRCA-Basal, SARC, UCEC, BLCA, STAD, SKCM-Primary, KIRP, LUSC, SKCM, OV, SKCM-Metastasis, KIRC	17		1	ACC	\	Macrophage M0	Bcell	2
		2	CD4+ Tcell	THYM, COAD, HNSC-HPV-, HNSC	OV, HNSC-HPV-	GBM, BRCA-Basal, SKCM, SKCM-Metastasis, LGG	10		2	BLCA	\	Macrophage M0, Macrophage M2	Macrophage M1, Monocyte, Mast Cell	5
		3	CD8+ Tcell	SKCM	KICH, PAAD, LUAD	BRCA-LumA	5		3	BRCA-Basal	Tregs	\	CD4+ Tcell, Tregs, Bcell, Mast Cell	4
		4	Dendritic Cell	ESCA	/	LUAD	2		4	BRCA-Her2	Tcell Follicular Helper, Monocyte	Tcell Follicular Helper	\	2
		5	Macrophage M0	LUSC, SARC, TGCT, HNSC-HPV-, HNSC, LUAD, OV, CESC, COAD, BRCA, BRCA-LumA	READ, ACC, THYM, HNSC-HPV-, BLCA, LUSC, HNSC, LUAD, BRCA	MESO, HNSC-HPV+, THYM, COAD, BRCA-LumB, HNSC, HNSC-HPV-	18		5	BRCA-LumA	Macrophage M0	\	CD8+ Tcell, Tcell Gamma Delta, Bcell, Macrophage M1	5
		6	Macrophage M1	DLBC, LIHC, LUAD	THYM, UCEC, SARC, KIRC, THCA, SKCM-Metastasis, SKCM	THYM, UCS, THCA, BLCA, BRCA-LumA, SKCM-Metastasis, SKCM, SARC, BRCA	14		6	BRCA-LumB	\	Tcell Gamma Delta	Macrophage M0	2
		7	Macrophage M2	TGCT	TGCT, KIRP, THYM, READ, BLCA, KIRC	TGCT, THYM, READ, LUSC, KIRC	7		7	BRCA	Tregs, Tcell Follicular Helper, Macrophage M0	Tcell Gamma Delta, Macrophage M0	Tcell Gamma Delta, Bcell, Macrophage M1	6
		8	Tcell Gamma Delta	/	PCPG, BRCA-LumB	THCA, BRCA-LumA, BRCA, LIHC	6		8	CESC	Macrophage M0	\	Natural Killer	2
		9	Tcell Follicular Helper	MESO, BRCA-Her2, KIRC, PCPG, BRCA, LUSC, THCA	BRCA-Her2, LGG	PCPG, THCA	8		9	CHOL	\	\	\	0
		10	Bcell	TGCT, COAD	HNSC-HPV+, SKCM-Metastasis, HNSC, SKCM, HNSC-HPV-	SKCM-Metastasis, SKCM, THYM, BRCA-Basal, ACC, GBM, OV, BRCA, PCPG, LIHC, PRAD, KIRC	17		10	COAD	CD4+ Tcell, Tregs, Bcell, Macrophage M0, Mast Cell	\	Macrophage M0	5
		11	Neutrophil	LIHC	MESO	HNSC-HPV+, MESO, LUSC	4		11	DLBC	Macrophage M1	\	Tregs	2
		12	Monocyte	UVM, BRCA-Her2	KIRC	LUAD, LIHC, LGG, LUSC, SARC, OV, BLCA	10		12	ESCA	Dendritic Cell	\	Tregs	2
		13	Natural Killer cells	KIRC	THYM, SARC	THYM, UVM, SARC, CESC, THCA	6		13	GBM	\	\	CD4+ Tcell, Bcell	2
		14	Treg cell	KICH, TGCT, BRCA-Basal, COAD, LUAD, LGG, BRCA	SKCM-Metastasis	DLBC, TGCT, SKCM-Metastasis, ESCA, BRCA-Basal, SKCM, UVM	12		14	HNSC	CD4+ Tcell, Macrophage M0	Bcell, Macrophage M0	Macrophage M0	3
									15	HNSC-HPV-	CD4+ Tcell, Macrophage M0	CD4+ Tcell, Bcell, Macrophage M0	Macrophage M0	3
									16	HNSC-HPV+	\	Bcell	Neutrophil, Macrophage M0	3
									17	KICH	Tregs	CD8+ Tcell	\	2
									18	KIRC	Tcell Follicular Helper, Natural Killer	Macrophage M1, Macrophage M2, Monocyte, Mast Cell	Bcell, Macrophage M2, Mast Cell	7
									19	KIRP	\	Macrophage M2	Mast Cell	2
									20	LIHC	Neutrophil, Macrophage M1, Mast Cell	\	Tcell Gamma Delta, Bcell, Monocyte	6
									21	LGG	Tregs, Mast Cell	Tcell Follicular Helper	CD4+ Tcell, Monocyte	5
									22	LUAD	Tregs, Macrophage M0, Macrophage M1	CD8+ Tcell, Macrophage M0	Monocyte, Mast Cell, Dendritic Cell	7
									23	LUSC	Tcell Follicular Helper, Macrophage M0	Macrophage M0	Neutrophil, Macrophage M2, Monocyte, Mast Cell	6
									24	MESO	Tcell Follicular Helper	Neutrophil	Neutrophil, Macrophage M0	3
									25	OV	Macrophage M0	CD4+ Tcell	Bcell, Monocyte, Mast Cell	5
									26	PAAD	\	CD8+ Tcell, Mast Cell	\	2
									27	PCPG	Tcell Follicular Helper	Tcell Gamma Delta	Tcell Follicular Helper, Bcell	3
									28	PRAD	\	\	Bcell	1
									29	READ	\	Macrophage M0, Macrophage M2	Macrophage M2	2
									30	SARC	Macrophage M0	Macrophage M1, Natural Killer, Mast Cell	Macrophage M1, Monocyte, Natural Killer, Mast Cell	5
									31	SKCM-Metastasis	\	Tregs, Bcell, Macrophage M1, Mast Cell	CD4+ Tcell, Tregs, Bcell, Macrophage M1, Mast Cell	6
									32	SKCM-Primary	\	\	Mast Cell	1
									33	SKCM	CD8+ Tcell	Bcell, Macrophage M1	CD4+ Tcell, Tregs, Bcell, Macrophage M1, Mast Cell	6
									34	STAD	\	Mast Cell	Mast Cell	1
									35	TGCT	Tregs, Bcell, Macrophage M0, Macrophage M2	Macrophage M2	Tregs, Macrophage M2	4
									36	THYM	CD4+ Tcell	Macrophage M0, Macrophage M1, Macrophage M2, Natural Killer	Bcell, Macrophage M0, Macrophage M1, Macrophage M2, Natural Killer	6
									37	THCA	Tcell Follicular Helper	Tcell Gamma Delta, Macrophage M1	Tcell Gamma Delta, Tcell Follicular Helper, Macrophage M1, Natural Killer	4
									38	UCEC	\	Macrophage M1, Mast Cell	Mast Cell	2
									39	UCS	\	\	Macrophage M1	1
									40	UVM	Monocyte	\	Tregs, Natural Killer	3
