# Supplementary material for: Modulatory effect of metformin and its transporters on immune infiltration in tumor microenvironment: a bioinformatic study with experimental validation
Source: Discov Oncol. 2025 May 31;16:973. doi: 10.1007/s12672-025-02766-y (PMC12126455; doi:10.1007/s12672-025-02766-y)
Supplement: Supplementary file 4 — Additional file4 [file 12672_2025_2766_MOESM4_ESM.xlsx]

## Sheet: Sheet1
	Immune Outcome Module						Supplementary file 4						Clinical Outcome of 14 immune infiltrates made by Immune Outcome Module (Cibersort algorithm) of TIMER2.0.
	Cibersort	TIMER 2.0											Decrease risk (blue color) means Z-score < 0
	Decreased Risk (Z<0)												Incrase risk (red color) means Z-score > 0
	Increased Risk (Z>0)												Split Infiltration Percentage of Patients: 50 %
													Survival Time Between: 200 months
	Mast Cell						Dendritic Cell						B cell						Neutrophil						Monocyte						Macrophage M0						Macrophage M1						Macrophage M2						Natural Killer cell
	Significant (<0.05)			Non-Significant (>0.05)			Significant (<0.05)			Non-Significant (>0.05)			Significant (<0.05)			Non-Significant (>0.05)			Significant (<0.05)			Non-Significant (>0.05)			Significant (<0.05)			Non-Significant (>0.05)			Significant (<0.05)			Non-Significant (>0.05)			Significant (<0.05)			Non-Significant (>0.05)			Significant (<0.05)			Non-Significant (>0.05)			Significant (<0.05)
	Cancer Type	P-value		Cancer Type	P-value		Cancer Type	P-value		Cancer Type	P-value		Cancer Type	P-value		Cancer Type	P-value		Cancer Type	P-value		Cancer Type	P-value		Cancer Type	P-value		Cancer Type	P-value		Cancer Type	P-value		Cancer Type	P-value		Cancer Type	P-value		Cancer Type	P-value		Cancer Type	P-value		Cancer Type	P-value		Cancer Type
	HNSC	0.0365		KIRC	0.666		LGG	0.0084		KIRP	0.108		BRCA-LumB	0.00535		HNSC	0.178		KIRC	0.0319		CESC	0.0789		UVM	0.000397		HNSC-HPV+	0.0693		DLBC	0.0351		LIHC	0.137		SKCM	5.35e-05		BRCA-Basal	0.0772		ACC	0.0471		KIRP	0.095		SKCM-Primary
	HNSC-HPV-	0.0201		UVM	0.176		DLBC	0.0441		ACC	0.069		LUSC	0.0487		UVM	0.151		LIHC	0.0111		ACC	0.725		LUSC	0.0364		THCA	0.408		KIRC	0.0457		BLCA	0.557		THYM	0.0498		PAAD	0.0822		STAD	0.0424		GBM	0.357		SARC
	SARC	0.00702		SKCM-Metastasis	0.0799		MESO	0.0158		KICH	0.943		KIRP	0.0406		ACC	0.172		SKCM	0.0246		PAAD	0.436		PAAD	0.0105		STAD	0.752		SKCM	0.0247		SARC	0.135		BRCA-LumA	0.0268		LGG	0.183		BRCA-Basal	0.037		BRCA	0.486		BRCA-LumB
				SKCM	0.128					UVM	NA		PAAD	0.0136		BRCA-Basal	0.508		BRCA-LumA	0.00553		STAD	0.661					PRAD	0.419		SKCM-Metastasis	0.0143		HNSC	0.726		UVM	0.0258		ACC	0.92		THYM	0.0337		BLCA	0.38		UVM
				UCEC	0.685					HNSC-HPV+	0.106					COAD	0.7					DLBC	0.076					BRCA	0.1		BRCA-LumA	0.0128		HNSC-HPV+	0.288		OV	0.0086		LUAD	0.0715		BRCA-LumA	0.0223		READ	0.509		KIRC
				PCPG	0.0639					THCA	0.128					STAD	0.181					BLCA	0.634					BRCA-Her2	0.545		ACC	0.00293		THCA	0.195		KIRP	0.00824		KICH	0.276		HNSC-HPV+	0.00501		OV	0.0805
				OV	0.767					UCEC	0.383					SKCM-Metastasis	0.678					ESCA	0.268					OV	0.132					LGG	0.603		BRCA	0.000501		DLBC	0.885		LIHC	0.00426		UCEC	0.271
				STAD	0.253					LUAD	0.808					CHOL	0.0801					BRCA-LumB	0.61					PCPG	0.0664					CESC	0.331		SKCM-Metastasis	0.000423		TGCT	0.999		LGG	0.00122		SKCM-Primary	0.389
				KICH	0.782					THYM	0.165					GBM	0.771					BRCA-Basal	0.849					BRCA-LumA	0.634					READ	0.373		BRCA-LumB	0.000277		UCEC	0.304		BRCA-LumB	0.000424		LUSC	0.514
				BLCA	0.219					HNSC	0.522					BLCA	0.236					MESO	0.24					KIRP	0.149					GBM	0.2					ESCA	0.992					BRCA-Her2	0.134
				PRAD	0.971					PAAD	0.658					MESO	0.672					CHOL	0.563					BRCA-Basal	0.122					SKCM-Primary	0.422					MESO	0.569					HNSC	0.402
				HNSC-HPV+	0.644					CESC	0.709					BRCA-LumA	0.973					GBM	0.551					BLCA	0.49					HNSC-HPV-	0.562					KIRC	0.656					LUAD	0.374
				BRCA-LumA	0.831					PRAD	0.661					SKCM	0.916					BRCA	0.0932					BRCA-LumB	0.193					LUAD	0.131					HNSC-HPV-	0.471					MESO	0.514
				PAAD	0.331					BLCA	0.123					THYM	0.119					HNSC-HPV+	0.67					UCS	0.583					UVM	0.184					COAD	0.968					DLBC	0.377
				READ	0.265					BRCA-Basal	0.661					THCA	0.672					KICH	0.162					SKCM-Metastasis	0.74					PAAD	0.0734					UCS	0.867					SKCM	0.383
				THCA	0.348					BRCA	0.844					UCS	0.238					LUAD	0.732					SKCM	0.798					CHOL	0.856					BLCA	0.361					COAD	0.129
				BRCA-Her2	0.654					PCPG	0.115					HNSC-HPV-	0.36					HNSC	0.794					HNSC	0.82					TGCT	0.564					HNSC	0.284					TGCT	0.601
				UCS	0.382					BRCA-LumA	0.966					TGCT	0.999					KIRP	0.646					LGG	0.0619					PRAD	0.229					THCA	0.0557					SKCM-Metastasis	0.524
				LIHC	0.894					OV	0.28					PRAD	0.277					HNSC-HPV-	0.445					MESO	0.0583					UCS	0.549					LUSC	0.057					SARC	0.407
				ACC	0.0747					SARC	0.379					OV	0.757					THYM	0.721					THYM	0.278					LUSC	0.604					SARC	0.207					KIRC	0.786
				LUAD	0.396					SKCM-Primary	0.37					KIRC	0.0677					COAD	0.567					CHOL	0.205					KICH	0.296					SKCM-Primary	0.391					THCA	0.193
				CESC	0.141					UCS	0.345					HNSC-HPV+	0.317					UCEC	0.92					LUAD	0.369					COAD	0.279					BRCA-Her2	0.95					UVM	0.267
				ESCA	0.235					CHOL	0.218					LGG	0.373					THCA	0.962					READ	0.309					UCEC	0.682					CESC	0.264					PRAD	0.749
				BRCA-Basal	0.218					KIRC	0.684					UCEC	0.59					PCPG	0.737					ESCA	0.547					BRCA-LumB	0.481					STAD	0.958					PCPG	0.94
				DLBC	0.343					STAD	0.961					LUAD	0.438					BRCA-Her2	0.412					ACC	0.951					STAD	0.203					HNSC-HPV+	0.703					UCS	0.79
				BRCA-LumB	0.316					ESCA	0.412					KICH	0.29					SKCM-Metastasis	0.0715					GBM	0.29					KIRP	0.636					PRAD	0.967					HNSC-HPV-	0.694
				GBM	0.79					LIHC	0.749					READ	0.569					UVM	0.664					SARC	0.383					PCPG	0.732					READ	0.389					CHOL	0.563
				BRCA	0.657					BRCA-LumB	0.944					DLBC	0.369					SARC	0.688					KIRC	0.563					MESO	0.792					PCPG	0.983					CESC	0.908
				MESO	0.245					GBM	0.707					BRCA	0.583					LGG	0.35					HNSC-HPV-	0.625					BRCA	0.057					LIHC	0.55					KICH	0.677
				COAD	0.302					READ	0.81					BRCA-Her2	0.488					OV	0.552					SKCM-Primary	0.487					BRCA-Her2	0.564					CHOL	0.73					ESCA	0.786
				CHOL	0.654					HNSC-HPV-	0.952					SKCM-Primary	0.921					READ	0.701					CESC	0.873					OV	0.905					GBM	0.278					PAAD	0.334
				LUSC	0.72					SKCM-Metastasis	0.63					ESCA	0.178					SKCM-Primary	0.778					COAD	0.605					THYM	0.773
				TGCT	0.564					BRCA-Her2	0.509					SARC	0.181					PRAD	0.907					TGCT	0.588					ESCA	0.609
				KIRP	0.927					SKCM	0.334					PCPG	0.334					LUSC	0.0948					DLBC	0.729					BRCA-Basal	0.932
				THYM	0.709					LUSC	0.34					CESC	0.615					UCS	0.949					LIHC	0.249
				SKCM-Primary	0.844					COAD	0.148					LIHC	0.923					TGCT	0.999					KICH	0.802
				LGG	0.0715					TGCT	0.999																	UCEC	0.544
[truncated: 23 more columns]
