# Supplementary material for: Modulatory effect of metformin and its transporters on immune infiltration in tumor microenvironment: a bioinformatic study with experimental validation
Source: Discov Oncol. 2025 May 31;16:973. doi: 10.1007/s12672-025-02766-y (PMC12126455; doi:10.1007/s12672-025-02766-y)
Supplement: Supplementary file 6 — Additional file6 [file 12672_2025_2766_MOESM6_ESM.xlsx]

## Sheet: Sheet1
		Supplementary file 6
		Intersection of Clinical Outcome (increase risk, or decrease risk, or decrease and increase risk), Immune infiltrate,
		and tumor types showing positive correlation with OCT1, OCT2, OCT3 gene expression in 32 types of tumor of TCGA data.
		Increase risk (yellow color) means Z-score > 0
		Decrease risk (blue color) means Z-score < 0
		Positive correlation tumor types with OCT1,2,3 gene expressions (red color)
		Intersection was done by Venny Website (http://timer.cistrome.org/)
		Increased Risk ( Z > 0 )
		Decreased Risk ( Z < 0 )
		All +ve Correlation Tumors Only																Intersection between Immune Infiltrates showing Decrease Risk Clinical Outcome with tumor types showing positive correlation with OCT1,2,3 genes expressions							Intersection between Immune Infiltrates showing both Decrease and Increase Risk Clinical Outcome with tumor types showing positive correlation with OCT1,2,3 genes expressions
	1) Clinical Outcome of Immune Infiltrate					2) Tumor types showing positive correlation with OCT genes from Gene Module												A)				B)			A)				B)
	Immune Infiltrate		Tumor Type	P-Value		Immune Inflitrates		OCT_1		OCT_2		OCT_3		Tumor Intersection Between Table 1 and Table 2
																		Tumor Type	Number of Occurrences of immune infiltrates in all tumor types	Types of Immune Infiltrates		Immune Infiltrate	Number of Occurrences of immune infiltrate in all tumor types		Tumor Type	Number of Occurrences of immune infiltrates in each tumor type	Types of Immune Infiltrates in each tumor type		Immune Infiltrate	Number of Occurrences of immune infiltrate in all tumor types
								Tumor Type	P-Value	Tumor Type	P-Value	Tumor Type	P-Value					BRCA	4	Macrophage M1, Treg Cells, Tcell Gamma Delta, Tcell Follicular Helper		Macrophage M1	4		BRCA	4	Macrophage M1, Treg Cells, Tcell Gamma Delta, Tcell Follicular Helper		Macrophage M1	5
																		BRCA-LumA	3	Macrophage M1, Macrophage M0, CD8+ T Cell		CD4+ Tcell	2		BRCA-LumA	3	Macrophage M1, Macrophage M0, CD8+ T Cell		NK Cells	3
						Mast Cell Activated						LUAD	9.21e-22					SKCM	2	Macrophage M1, CD8+ T Cell		CD8+ T Cell	2		SKCM	3	Macrophage M1, CD4+ Tcell, CD8+ T Cell		CD4+ Tcell	3
												BRCA-Basal	1.89e-06					SARC	2	Mast Cell, NK Cells		Tcell Follicular Helper	2		THYM	3	Macrophage M1, Macrophage M2, CD4+ Tcell		Monocyte	2
												SARC	1.05e-05					SKCM-Metastasis	1	Macrophage M1		NK Cells	1		SARC	2	Mast Cell, NK Cells		Macrophage M0	2
												UCEC	0.0189					LGG	1	CD4+ Tcell		Macrophage M0	1		UVM	2	Monocyte, NK Cells		CD8+ T Cell	2
										UCEC	0.00806	BLCA	1.82e-05					THCA	1	Tcell Follicular Helper		Mast Cell	1		LIHC	1	Neutrophil		Tcell Follicular Helper	2
	Mast Cell Activated		HNSC	0.0365				LIHC	0.0142	PAAD	0.000812	STAD	3.41e-05					THYM	1	CD4+ Tcell		Monocyte	1		LUSC	1	Monocyte		Mast Cell	1
			HNSC-HPV-	0.0201				COAD	0.0441	STAD	0.00525	SKCM-Primary	0.04		SARC			UVM	1	Monocyte		Treg Cells	1		ACC	1	Macrophage M0		Neutrophil	1
			SARC	0.00702				LGG	0.0334	SARC	0.0288	KIRP	0.00108									Tcell Gamma Delta	1		SKCM-Metastasis	1	Macrophage M1		Macrophage M2	1
										SKCM-Metastasis	0.0497	LUSC	9.37e-06									Dendritic Cells	0		KIRC	1	NK Cells		Treg Cells	1
										KIRC	0.0319	SKCM	0.00208									B Cell	0		LGG	1	CD4+ Tcell		Tcell Gamma Delta	1
												OV	0.0433									Neutrophil	0		THCA	1	Tcell Follicular Helper		Dendritic Cell	0
												SKCM-Metastasis	0.0184									Macrophage M2	0						B Cell	0
												KIRC	0.0142					Intersection results between decrease risk immune infiltrates							The frequency of intersection between both of increase and decrease risk immune infiltrates
																		and tumor types showing positive correlation with OCT genes.							and types of tumor that show positive correlation with OCT genes.
	Dendritic Cell		LGG	0.0084		Dendritic Cells												A) Number of tumor types with a positive correlation with OCT genes that is shown in each immune infiltrate							Intersection was done by Venny Website (https://bioinfogp.cnb.csic.es/tools/venny/)
			DLBC	0.0441				ESCA	0.0071	\	\	LUAD	2.11e-05		\			B) Number of immune infiltrates shown in tumor types that showed a positive correlation with OCT genes
			MESO	0.0158
						B Cell						SKCM-Metastasis	2.08e-15
												SKCM	2.69e-12
												THYM	0.000625
												BRCA-Basal	0.000161
										HNSC-HPV+	0.0224	ACC	0.0445
	B Cell		BRCA-LumB	0.00535				TGCT	0.00333	SKCM-Metastasis	0.00532	BRCA-LumA	2.18e-07
			LUSC	0.0487				COAD	0.024	HNSC	0.00163	GBM	0.0209		\
			KIRP	0.0406						SKCM	0.00736	OV	0.00219
			PAAD	0.0136						HNSC-HPV-	0.0302	BRCA	2.42e-09
												PCPG	0.0287
												LIHC	0.00709
												PRAD	0.00453
												KIRC	0.0424
	Neutrophil		KIRC	0.0319		Neutrophil						HNSC-HPV+	0.00303
			LIHC	0.0111				LIHC	0.0438	MESO	0.0075	MESO	0.00494		LIHC
			SKCM	0.0246								LUSC	0.0159
			BRCA-LumA	0.00553
						Monocyte						LUAD	2.82e-07
												LIHC	0.000198
	Monocyte		UVM	0.000397				UVM	0.0161			LGG	1.31e-05		UVM
			LUSC	0.0364				BRCA-Her2	0.0426	KIRC	0.0436	LUSC	0.000431		LUSC
			PAAD	0.0105								SARC	0.0157
												OV	0.0453
												BLCA	0.0471
						Macrophage M0		LUSC	1.89e-06
								SARC	0.00115	READ	0.00111
								TGCT	0.018	ACC	0.0472	MESO	0.0356
	Macrophage M0		DLBC	0.0351				HNSC-HPV-	0.000123	THYM	0.0227	HNSC-HPV+	0.0351
			KIRC	0.0457				HNSC	5.96e-05	HNSC-HPV-	0.00374	THYM	0.0317		BRCA-LumA
			SKCM	0.0247				LUAD	0.000487	BLCA	0.0102	COAD	0.00234		ACC
			SKCM-Metastasis	0.0143				OV	0.015	LUSC	0.00599	BRCA-LumB	0.0217
			BRCA-LumA	0.0128				CESC	0.017	HNSC	0.0114	HNSC	0.000261
			ACC	0.00293				COAD	0.0197	LUAD	0.0385	HNSC-HPV-	0.00605
								BRCA	1.26e-05	BRCA	0.0165
								BRCA-LumA	0.00609
	Macrophage M1		SKCM	5.35e-05		Macrophage M1						THYM	1.76e-05
			THYM	0.0498						THYM	0.000154	UCS	0.0338
			BRCA-LumA	0.0268						UCEC	0.0038	THCA	8.95e-10		SKCM
			UVM	0.0258				DLBC	0.0014	SARC	0.000914	BLCA	3.52e-05		THYM
			OV	0.0086				LIHC	0.00133	KIRC	0.0002	BRCA-LumA	2.19e-06		BRCA-LumA
			KIRP	0.00824				LUAD	0.00598	THCA	0.000134	SKCM-Metastasis	0.00011		BRCA
			BRCA	0.000501						SKCM-Metastasis	0.0468	SKCM	2.5e-05		SKCM-Metastasis
			SKCM-Metastasis	0.000423						SKCM	0.0458	SARC	0.00888
			BRCA-LumB	0.000277								BRCA	0.000111
	Macrophage M2		ACC	0.0471
			STAD	0.0424		Macrophage M2				TGCT	1.84e-09	TGCT	7.91e-08
			BRCA-Basal	0.037						KIRP	3.08e-06	THYM	9.73e-05
			THYM	0.0337				TGCT	0.027	THYM	0.00232	READ	0.0437		THYM
			BRCA-LumA	0.0223						READ	0.021	LUSC	0.00212
			HNSC-HPV+	0.00501						BLCA	0.0142	KIRC	0.00863
			LIHC	0.00426						KIRC	0.0196
			LGG	0.00122
			BRCA-LumB	0.000424
	NK Cells		SKCM-Primary	0.00596		NK Cells						THYM	0.00821
			SARC	0.0243								UVM	0.0341		SARC
			BRCA-LumB	0.0416				KIRC	0.00688	THYM	0.00223	SARC	0.0013		UVM
			UVM	0.0121						SARC	0.00913	CESC	0.00209		KIRC
			KIRC	0.00199								THCA	0.0469
						Treg Cells		KICH	0.00715			DLBC	0.0437
	Treg Cells		HNSC-HPV+	0.0016				TGCT	0.00861			TGCT	0.0008
			BRCA-LumB	0.0165				BRCA-Basal	0.0353			SKCM-Metastasis	1.85e-06
			BRCA-LumA	0.00564				COAD	0.0193	SKCM-Metastasis	0.0137	ESCA	0.0154		BRCA
			KIRC	0.00142				LUAD	0.00543			BRCA-Basal	0.0247
			BRCA	0.0014				LGG	0.0107			SKCM	0.000357
								BRCA	0.0105			UVM	0.201
	CD4+ Tcell		LGG	0.0446		CD4+ Tcell						GBM	0.0185
			THYM	0.015				THYM	0.0234			BRCA-Basal	0.0178		LGG
			THCA	0.0311				COAD	0.0169	OV	0.0334	SKCM	0.00247		THYM
			SKCM	0.0286				HNSC-HPV-	0.0321	HNSC-HPV-	0.0231	SKCM-Metastasis	0.00809		SKCM
								HNSC	0.0194			LGG	0.0101
	CD8+ T Cell		SKCM	0.000289
			HNSC	0.111
			BRCA-LumA	0.0438
			THYM	0.0435
			LIHC	0.0408
			BLCA	0.039		CD8+ T Cell				KICH	0.0263				SKCM
			DLBC	0.0355				SKCM	0.0357	PAAD	0.000484	BRCA-LumA	0.0249		BRCA-LumA
			UVM	0.0254						LUAD	0.0415
			BRCA	0.0135
			SKCM-Primary	0.00838
			LGG	0.00634
			SKCM-Metastasis	0.00365
			CESC	0.000578
			HNSC HPV+ve	0.000393
	Tcell Gamma Delta		CESC	0.0133		Tcell Gamma Delta				PCPG	0.0376	THCA	4.6e-06
			BRCA	0.0488				\	\	BRCA-LumB	0.0295	BRCA-LumA	0.000602		BRCA
			COAD	0.0427						BRCA	0.000604	BRCA	0.000213
			UVM	0.001						THCA	0.0219	LIHC	0.0376
	Tcell Follicular Helper		STAD	0.042		Tcell Follicular Helper		MESO	0.019
			THCA	0.0331				BRCA-Her2	0.0483
			OV	0.0303				KIRC	1.04e-06	BRCA-Her2	0.00634	PCPG	0.00379		THCA
			BRCA-LumA	0.0297				PCPG	0.0443	LGG	0.016	THCA	0.00284		BRCA
			BRCA	0.00257				BRCA	0.000383
			UVM	0.00233				LUSC	0.0296
								THCA	0.0395
