# Supplementary material for: Modulatory effect of metformin and its transporters on immune infiltration in tumor microenvironment: a bioinformatic study with experimental validation
Source: Discov Oncol. 2025 May 31;16:973. doi: 10.1007/s12672-025-02766-y (PMC12126455; doi:10.1007/s12672-025-02766-y)
Supplement: Supplementary file 8 — Additional file8 [file 12672_2025_2766_MOESM8_ESM.xlsx]

## Sheet: Sheet1
		Supplementary file 8
		All Data								Only Significant Results
		Tumor Types	OCT_1	OCT_2	OCT_3					Tumor Types	OCT_1	OCT_2	OCT_3
			P-Values								P-Values (<0.05)
		ACC	0.0412	0.186	0.000219					ACC	0.0412	0.186	0.000219
		BLCA	0.0158	0.108	0.0113					BLCA	0.0158	0.108	0.0113
		BRCA	0.243	0.00946	0.487					BRCA	0.243	0.00946	0.487
		BRCA-Basal	0.826	0.801	0.466					BRCA-LumA	0.0231	0.141	0.653
		BRCA-Her2	0.985	0.637	0.463					KIRC	0.0758	1.47e-08	0.0147
		BRCA-LumA	0.0231	0.141	0.653					KIRP	0.441	0.00805	0.106
		BRCA-LumB	0.254	0.579	0.666					MESO	0.0101	0.355	0.0262
		CESC	0.431	0.88	0.127					OV	0.254	0.0205	0.0422
		CHOL	0.547	0.379	0.345					SKCM	0.637	0.00504	0.0849
		COAD	0.401	0.14	0.551					SKCM-Metastasis	0.567	0.00481	0.0222
		DLBC	0.695	0.186	0.753					THCA	0.131	0.368	0.0422
		ESCA	0.681	0.654	0.369
		GBM	0.504	0.127	0.473
		HNSC	0.603	0.688	0.49					Clinical Outcome of OCT genes expressions in 32 tumor types of TCGA data.
		HNSC-HPV-	0.538	0.683	0.805					Data was expressed by Gene_Outcome Module in TIMER2.0 (http://timer.cistrome.org/).
		HNSC-HPV+	0.792	0.701	0.576					Significant results (P-value < 0.05) of the clinical relevance of OCT1, OCT2, and OCT3 genes expression in different tumor types.
		KICH	0.301	0.416	0.29					Survival Time Between up to 200+ Months
		KIRC	0.0758	1.47e-08	0.0147					Split expression percentage of patients = 50% by Kaplan-Meier Curve
		KIRP	0.441	0.00805	0.106					Increase risk (red color) means Z-score > 0
		LGG	0.0817	0.304	0.21					Decrease risk (blue color) means Z-score < 0
		LIHC	0.0869	0.55	0.644
		LUAD	0.486	0.329	0.0613
		LUSC	0.655	0.596	0.0622
		MESO	0.0101	0.355	0.0262
		OV	0.254	0.0205	0.0422
		PAAD	0.845	0.998	0.21
		PCPG	0.998	0.755	0.344
		PRAD	0.656	0.912	0.12
		READ	0.393	0.977	0.299
		SARC	0.325	0.303	0.773
		SKCM	0.637	0.00504	0.0849
		SKCM-Metastasis	0.567	0.00481	0.0222
		SKCM-Primary	0.792	0.872	0.127
		STAD	0.928	0.0632	0.638
		TGCT	0.613	0.601	0.557
		THCA	0.131	0.368	0.0422
		THYM	0.733	0.778	0.356
		UCEC	0.666	0.411	0.604
		UCS	0.867	0.737	0.681
		UVM	0.183	0.794	0.137
