# Supplementary material for: Modulatory effect of metformin and its transporters on immune infiltration in tumor microenvironment: a bioinformatic study with experimental validation
Source: Discov Oncol. 2025 May 31;16:973. doi: 10.1007/s12672-025-02766-y (PMC12126455; doi:10.1007/s12672-025-02766-y)
Supplement: Supplementary file 9 — Additional file9 [file 12672_2025_2766_MOESM9_ESM.xlsx]

## Sheet: Sheet1
Target name	Confidence	ChEMBL id
Beta-1 adrenergic receptor	0.6135	CHEMBL213
Beta-2 adrenergic receptor	0.5588	CHEMBL210
Thrombin	0.5554	CHEMBL204
cGMP-dependent protein kinase 1 beta	0.4646	CHEMBL4273
CaM kinase IV	0.4305	CHEMBL2494
Mitogen-activated protein kinase 6	0.4149	CHEMBL5121			Supplementary file 9
Protein kinase C iota	0.3873	CHEMBL2598
Phosphatidylinositol-4-phosphate 5-kinase type-1 gamma	0.3504	CHEMBL1908383			Possible target proteins prediction for metformin using Way2drug bioinformatic tool
Testis-specific serine/threonine-protein kinase 1	0.334	CHEMBL6003			citation: https://www.tandfonline.com/doi/abs/10.1080/1062936X.2015.1078407#.VsndlfmLRaQ
Dual specificity mitogen-activated protein kinase kinase 7	0.3296	CHEMBL3530
cAMP-dependent protein kinase beta-1 catalytic subunit	0.3093	CHEMBL2918
MAP kinase ERK1	0.2931	CHEMBL3385
Serine/threonine-protein phosphatase	0.2839	CHEMBL1293265
Lysine-specific histone demethylase 1	0.2457	CHEMBL6136
Kallikrein 1	0.2356	CHEMBL2319
Serine protease hepsin	0.2321	CHEMBL2079849
3-phosphoinositide dependent protein kinase-1	0.2295	CHEMBL2534
Cytochrome P450 2D6	0.2275	CHEMBL289
Plasminogen	0.2238	CHEMBL1801
PAS domain-containing serine/threonine-protein kinase	0.2153	CHEMBL6054
Nitric-oxide synthase, endothelial	0.2091	CHEMBL4803
Vitamin K-dependent protein C	0.1949	CHEMBL4444
Cytochrome P450 2B6	0.1907	CHEMBL4729
Nuclear receptor subfamily 4 group A member 1	0.1899	CHEMBL1293229
Dual-specificity tyrosine-phosphorylation regulated kinase 2	0.1821	CHEMBL4376
Poly [ADP-ribose] polymerase 2	0.1757	CHEMBL5366
Telomerase reverse transcriptase	0.1711	CHEMBL2916
Tissue-type plasminogen activator	0.1706	CHEMBL1873
Matriptase	0.1575	CHEMBL3018
DNA-(apurinic or apyrimidinic site) lyase	0.1568	CHEMBL5619
Muscarinic acetylcholine receptor M4	0.1499	CHEMBL1821
Urotensin II receptor	0.1437	CHEMBL3764
cGMP-dependent protein kinase 2	0.1435	CHEMBL2896
BR serine/threonine-protein kinase 2	0.1418	CHEMBL4574
Hepatocyte growth factor activator	0.1407	CHEMBL3351190
Quinone reductase 2	0.1366	CHEMBL3959
Alpha-synuclein	0.132	CHEMBL6152
Plasma kallikrein	0.1313	CHEMBL2000
Neuronal acetylcholine receptor protein alpha-7 subunit	0.1312	CHEMBL2492
Serine/threonine-protein kinase Nek1	0.1304	CHEMBL5855
Serine/threonine-protein kinase Sgk2	0.1285	CHEMBL5794
Insulin-degrading enzyme	0.124	CHEMBL1293287
Nitric-oxide synthase, brain	0.1186	CHEMBL3568
Angiotensin II type 2 (AT-2) receptor	0.1185	CHEMBL4607
Serine/threonine-protein kinase PAK 3	0.1168	CHEMBL2999
Protein kinase C eta	0.1167	CHEMBL3616
Serotonin 6 (5-HT6) receptor	0.1145	CHEMBL3371
Metabotropic glutamate receptor 5	0.1142	CHEMBL3227
Intermediate conductance calcium-activated potassium channel protein 4	0.0991	CHEMBL4305
Phosphodiesterase 7B	0.0955	CHEMBL4716
Melanocortin receptor 3	0.0943	CHEMBL4644
Melanocortin receptor 1	0.0914	CHEMBL3795
Melanocortin receptor 5	0.0896	CHEMBL4608
Protein kinase C gamma	0.0888	CHEMBL2938
Ribosomal protein S6 kinase alpha 5	0.085	CHEMBL4237
BR serine/threonine-protein kinase 1	0.082	CHEMBL5650
Nitric oxide synthase, inducible	0.0812	CHEMBL4481
Serine/threonine-protein kinase 32B	0.0801	CHEMBL5912
C-C chemokine receptor type 5	0.0799	CHEMBL274
Serine/threonine-protein kinase AKT3	0.0789	CHEMBL4816
Peptidyl-prolyl cis-trans isomerase NIMA-interacting 1	0.0779	CHEMBL2288
Coagulation factor VII	0.0769	CHEMBL3991
Dual-specificity tyrosine-phosphorylation regulated kinase 1A	0.0764	CHEMBL2292
Dual specificity tyrosine-phosphorylation-regulated kinase 1B	0.0745	CHEMBL5543
C3a anaphylatoxin chemotactic receptor	0.0739	CHEMBL4761
Cathepsin H	0.0709	CHEMBL2225
Trypsin I	0.0701	CHEMBL209
Serine/threonine-protein kinase PLK1	0.0693	CHEMBL3024
NAD-dependent deacetylase sirtuin 1	0.0693	CHEMBL4506
Coagulation factor XI	0.0607	CHEMBL2820
Aminopeptidase N	0.0606	CHEMBL1907
Alpha-2a adrenergic receptor	0.0497	CHEMBL1867
Serine/threonine-protein kinase WNK2	0.0488	CHEMBL5639
Coagulation factor IX	0.0456	CHEMBL2016
Urokinase-type plasminogen activator	0.0445	CHEMBL3286
Tyrosyl-DNA phosphodiesterase 2	0.0421	CHEMBL2169736
Phosphatidylinositol-5-phosphate 4-kinase type-2 beta	0.0391	CHEMBL5667
Serine/threonine-protein kinase LATS1	0.0387	CHEMBL6167
MAP kinase ERK2	0.0376	CHEMBL4040
Neuropeptide Y receptor type 2	0.0367	CHEMBL4018
Neurotensin receptor 1	0.0367	CHEMBL4123
Amine oxidase, copper containing	0.0353	CHEMBL3437
6-phosphofructo-2-kinase/fructose-2,6-bisphosphatase 3	0.0338	CHEMBL2331053
Myeloperoxidase	0.0337	CHEMBL2439
Hexokinase type IV	0.0336	CHEMBL3820
Inhibitor of apoptosis protein 3	0.0336	CHEMBL4198
Menin	0.0329	CHEMBL1615381
Protein kinase C beta	0.0306	CHEMBL3045
DNA (cytosine-5)-methyltransferase 1	0.0296	CHEMBL1993
G protein-coupled receptor kinase 5	0.0296	CHEMBL5678
Casein kinase I gamma 1	0.0295	CHEMBL2426
Phosphodiesterase 9A	0.0236	CHEMBL3535
Histone-arginine methyltransferase CARM1	0.0236	CHEMBL5406
Casein kinase I gamma 2	0.0233	CHEMBL2543
Leukotriene B4 receptor 1	0.0213	CHEMBL3911
Glutamate [NMDA] receptor subunit epsilon 2	0.0207	CHEMBL1904
Aldehyde dehydrogenase dimeric NADP-preferring	0.0188	CHEMBL3578
Muscarinic acetylcholine receptor M5	0.0177	CHEMBL2035
Melanocortin receptor 4	0.0177	CHEMBL259
GAR transformylase	0.0174	CHEMBL3972
Carboxypeptidase N, catalytic subunit	0.0172	CHEMBL4713
Glucagon-like peptide 1 receptor	0.0163	CHEMBL1784
Coagulation factor X	0.0148	CHEMBL244
Beta secretase 2	0.0143	CHEMBL2525
Somatostatin receptor 5	0.0142	CHEMBL1792
Histone acetyltransferase PCAF	0.0134	CHEMBL5500
Serine/threonine-protein kinase 17A	0.0102	CHEMBL4525
Carboxypeptidase B2 isoform A	0.0101	CHEMBL3419
Beta amyloid A4 protein	0.0092	CHEMBL2487
Cytochrome P450 2A6	0.0086	CHEMBL5282
Cytochrome P450 26A1	0.007	CHEMBL5141
Farnesyl diphosphate synthase	0.0069	CHEMBL1782
5-lipoxygenase activating protein	0.0057	CHEMBL4550
Tryptase beta-1	0.0054	CHEMBL2617
Serine/threonine-protein kinase Sgk1	0.005	CHEMBL2343
Protein kinase C alpha	0.0033	CHEMBL299
Histone-lysine N-methyltransferase, H3 lysine-79 specific	0.0026	CHEMBL1795117
